# Supplementary material for: The Major Prognostic Features of Nuclear Receptor NR5A2 in Infiltrating Ductal Breast Carcinomas
Source: Int J Genomics. 2015 Aug 23;2015:403576. doi: 10.1155/2015/403576 (PMC4561099; doi:10.1155/2015/403576)
Supplement: Supplementary file 1 — There are ten supplemental files gathered to be the supplementary information. We collected the Venn diagram figures and their corresponding gene pools to form the unique table. It consists of supplemental files 1-6. We have gathered the key heatmaps results of the network analyses in supplemental files 7-8. It includes the clinical relevant gene profiling, the pathway analyses and the partially validated results of the network analysis. The major results of survival analyses are listed in supplemental file 9. In addition, we put the ANOVA test results of a few important transcription factors for showing their clinical impacts in supplemental file 9. The supplemental file 10 includes (1) the gene expression patterns of the gene signature (292 probes), the gene components of NR5A2 network overlapping with clinical relevant genes; (2) the potential pathophysiological activities driven by NR5A1 and NR5A2 in 181A cohort, respectively; and (3) univariate and multivariate analyses for survival on prognostic factors in 91A cohort and 181A cohort. [file 403576.f1.pdf]

**Title:** The major prognostic features of nuclear receptor *NR5A2* in infiltrating ductal breast carcinomas

**Table of content (pages 1-8)**

**Suppls.1-6** are summarized gene pools in one combined illustration with sets of their corresponding Venn diagrams. Five hundred and three gene symbols are left as “blank” within Tables based on annotation provided by Gene Spring GX7.3.1 (March, 2011). One unique table for suppl.1, 2, 3, 4, 5 and 6 has been generated. The gene symbols are transcription factors and components of interest within this table based on annotation provided by Gene Spring GX7.3.1 (March, 2011). The gene symbols high-lighted with light blue are either transcription factors or transcription factor subunits or transcript variants. The remaining gene symbols are molecules of interest in this study. We only mark “Y” in each table that means the gene symbol to be one of the components listed in the analysis of interest.

**Suppl. 7** contains heatmaps for (1) the common gene pools shared by seven signal transduction pathways and the network of *NR5A2* in 91A cohort, respectively; (2) the common gene pools shared by five top lists of signal transduction pathways and the clinically significant network of *NR5A2* in 181A cohort, respectively.

**Suppl. 8** shows the gene expression pattern of the prognostic relevant signature in relation to the gene expression pattern of a transcription factor in two cohorts.

**Suppl. 9** shows (1) the survival curves for 8 probes in Figure 7 and *NR5A1*; (2) Mean plot analyses of mRNA levels for *NR5A1*(652), *NR5A2* (16670) in eight clinical categories, respectively.

**Suppl. 10** shows (1) the common transcription factor pools between clinically significant\_cohort enriched network of *NR5A2* and histological grade, mitotic count, nuclear pleomorphism, respectively; (2) the common gene pool in prognostic feature type IV of *NR5A1* and *NR5A2*.

**Suppls. 1-6. (pages 9-88)**

**Suppl. 1.**

**Table S1.1.** Clinicopathological significant cluster of histological grade (grade),

mitotic count (MC) and nuclear pleomorphism (NP) in 181 infiltrating ductal breast carcinomas. (1,097 probes)

**Table S1.2.** The network of *NR5A2* predicted to be relevant in grade, MC, and NP in 181 infiltrating ductal breast carcinomas. (758 probes)

**Table S1.3.** The overlapped network of *NR5A2* predicted to be relevant to both clinical cluster of *NR5A2* and clinically relevant *NR5A2* transcriptional regulatory network.(623 probes)

**Table S1.4.** The *NR5A2* network not only relevant to grade, NP and MC (Table S1.2) but to 181 infiltrating ductal breast carcinomas . (331 probes)

## **Suppl. 2.**

**Table S2.1.** The clinically relevant and cohort enriched network of *NR5A2* relevant to histological grade in 181 infiltrating ductal breast carcinomas.

**Table S2.2.** The clinically relevant and cohort enriched network of *NR5A2* relevant to mitotic count in 181 infiltrating ductal breast carcinomas.

**Table S2.3.** The clinically relevant and cohort enriched network of *NR5A2* relevant to nuclear pleomorphism in 181 infiltrating ductal breast carcinomas.

**Table S2.4.** The clinically relevant and cohort enriched network of *NR5A2* relevant to stage in 181 infiltrating ductal breast carcinomas.

**Table S2.5.** The clinically relevant and cohort enriched network of *NR5A2* relevant to tubule formation in 181 infiltrating ductal breast carcinomas.

**Table S2.6.** The clinically relevant and cohort enriched network of *NR5A2* relevant to lymphovascular invasion in 181 infiltrating ductal breast carcinomas.

**Table S2.7.** The clinically relevant and cohort enriched network of *NR5A2* relevant to number of lymph node metastasis in 181 infiltrating ductal breast carcinomas.

**Table S2.8.** The clinically relevant and cohort enriched network of *NR5A2* relevant to lymph node metastasis in 181 infiltrating ductal breast carcinomas.

**Table S2.9.** The clinically relevant and cohort enriched network of *NR5A2* relevant to tumor size in 181 infiltrating ductal breast carcinomas.

**Table S2.10.** The clinically relevant and cohort enriched network of *NR5A2* relevant to age in 181 infiltrating ductal breast carcinomas.

## **Suppl. 3.**

**Table S3.1.** The cohort enriched network of *NR5A2* relevant to cell cycle signal transduction pathway in 91 infiltrating ductal breast carcinomas.

**Table S3.2.** The cohort enriched network of *NR5A2* relevant to VEGF signal

transduction pathway in 91 infiltrating ductal breast carcinomas.

**Table S3.3.** The cohort enriched network of *NR5A2* relevant to p53 signal transduction pathway in 91 infiltrating ductal breast carcinomas.

**Table S3.4.** The cohort enriched network of *NR5A2* relevant to ribosomes in 91 infiltrating ductal breast carcinomas.

**Table S3.5.** The cohort enriched network of *NR5A2* relevant to PDGFRB signal transduction pathway in 91 infiltrating ductal breast carcinomas.

**Table S3.6.** The cohort enriched network of *NR5A2* relevant to ERBB2 signal transduction pathway in 91 infiltrating ductal breast carcinomas.

**Table S3.7.** The cohort enriched network of *NR5A2* relevant to proteasomes in 91 infiltrating ductal breast carcinomas.

**Table S3.8.** The cohort enriched network of *NR5A2* relevant to HSA in 91 infiltrating ductal breast carcinomas.

**Table S3.9.** The cohort enriched network of *NR5A2* relevant to BER in 91 infiltrating ductal breast carcinomas.

**Table S3.10.** The cohort enriched network of *NR5A2* relevant to MRP in 91 infiltrating ductal breast carcinomas.

**Table S3.11.** The cohort enriched network of *NR5A2* relevant to DRS in 91 infiltrating ductal breast carcinomas.

**Table S3.12.** The cohort enriched network of *NR5A2* relevant to HR in 91 infiltrating ductal breast carcinomas.

**Table S3.13.** The cohort enriched network of *NR5A2* relevant to NER in 91 infiltrating ductal breast carcinomas.

#### **Suppl. 4.**

**Table S4.1.** The cohort enriched network of *NR5A2* relevant to cell cycle signal transduction pathway in 181 infiltrating ductal breast carcinomas.

**Table S4.2.** The cohort enriched network of *NR5A2* relevant to VEGF signal transduction pathway in 181 infiltrating ductal breast carcinomas.

**Table S4.3.** The cohort enriched network of *NR5A2* relevant to p53 signal transduction pathway in 181 infiltrating ductal breast carcinomas.

**Table S4.4.** The cohort enriched network of *NR5A2* relevant to ribosomes in 181 infiltrating ductal breast carcinomas.

**Table S4.5.** The cohort enriched network of *NR5A2* relevant to PDGFRB signal transduction pathway in 181 infiltrating ductal breast carcinomas.

**Table S4.6.** The cohort enriched network of *NR5A2* relevant to ERBB2 signal transduction pathway in 181 infiltrating ductal breast carcinomas.

**Table S4.7.** The cohort enriched network of *NR5A2* relevant to proteasomes in 181 infiltrating ductal breast carcinomas.

**Table S4.8.** The cohort enriched network of *NR5A2* relevant to HSA in 181 infiltrating ductal breast carcinomas.

**Table S4.9.** The cohort enriched network of *NR5A2* relevant to BER in 181 infiltrating ductal breast carcinomas.

**Table S4.10.** The cohort enriched network of *NR5A2* relevant to MRP in 181 infiltrating ductal breast carcinomas.

**Table S4.11.** The cohort enriched network of *NR5A2* relevant to DRS in 181 infiltrating ductal breast carcinomas.

**Table S4.12.** The cohort enriched network of *NR5A2* relevant to HR in 181 infiltrating ductal breast carcinomas.

**Table S4.13.** The cohort enriched network of *NR5A2* relevant to NER in 181 infiltrating ductal breast carcinomas.

## **Suppl. 5.**

**Table S5.1.** The overlapping gene pool between network of 91\_*NR5A2* and the prognosis predictors significant in 181, 91 and 90 infiltrating ductal breast carcinomas (or network of Feature type I\_91\_*NR5A2*). Surv. 90 stands for probes to be significant in Kaplan-Meier survival analysis for 90A cohort. Likewise, Surv. 91 and Surv. 181 are based on such definition except in different cohorts.

**Table S5.2.** The overlapping gene pool between network of 91\_*NR5A2* and prognosis predictors significant in both 181 and 91 infiltrating ductal breast carcinomas (or network of Feature type II\_91\_*NR5A2*). Not Surv. 90 stands for probes to be not significant in Kaplan-Meier survival analysis for 90A cohort.

**Table S5.3.** The overlapping gene pool between network of 91\_*NR5A2* and prognosis predictors significant in both 90 and 91 infiltrating ductal breast carcinomas (or network of Feature type III\_91\_*NR5A2*).

**Table S5.4.** The overlapping gene pool between network of 91\_*NR5A2* and prognosis predictors significant in 91 infiltrating ductal breast carcinomas (or network of Feature type IV\_91\_*NR5A2*).

**Table S5.5.** The overlapping gene pool between network of 181\_*NR5A2* and prognosis predictors significant in 91, 181 and 90 infiltrating ductal breast carcinomas (or network of Feature type I\_181\_*NR5A2*).

**Table S5.6.** The overlapping gene pool between network of 181\_*NR5A2* and prognosis predictors significant in both 181 and 90 infiltrating ductal breast

carcinomas (or network of Feature type II\_181\_ *NR5A2*).

**Table S5.7.** The overlapping gene pool between network of 181\_ *NR5A2* and prognosis predictors significant in both 181 and 91 infiltrating ductal breast carcinomas (or network of Feature type III\_181\_ *NR5A2*).

**Table S5.8.** The overlapping gene pool between network of 181\_ *NR5A2* and prognosis predictors significant in 181 infiltrating ductal breast carcinomas (or network of Feature type IV\_181\_ *NR5A2*).

**Table S5.9.** The overlapping gene pool between network of Feature type II\_91\_ *NR5A2* and network of Feature type II\_181\_ *NR5A2*.

#### **Suppl. 6.**

**Table S6.1.** The overlapping gene pool between network of 181\_ *NR5A1* and prognosis predictors significant in 91, 181 and 90 infiltrating ductal breast carcinomas (or network of Feature type I\_181\_ *NR5A1*).

**Table S6.2.** The overlapping gene pool between network of 181\_ *NR5A1* and prognosis predictors significant in both 181 and 90 infiltrating ductal breast carcinomas (or network of Feature type II\_181\_ *NR5A1*).

**Table S6.3.** The overlapping gene pool between network of 181\_ *NR5A1* and prognosis predictors significant in both 181 and 91 infiltrating ductal breast carcinomas (or network of Feature type III\_181\_ *NR5A1*).

**Table S6.4.** The overlapping gene pool between network of 181\_ *NR5A1* and prognosis predictors significant in 181 infiltrating ductal breast carcinomas (or network of Feature type IV\_181\_ *NR5A1*).

**Table S6.5.** The overlapping gene pool between network of Feature type II\_181\_ *NR5A1* and network of Feature type II\_181\_ *NR5A2*.

**Table S6.6.** The overlapping gene pool between network of Feature type IV\_181\_ *NR5A1* and network of Feature type IV\_181\_ *NR5A2*.

#### **Suppl. 7. (pages 89-95)**

**Figure S7.1.** Heatmaps for the common gene pool in both cell cycle signal transduction pathway and the network of *NR5A2* in 91A cohort. “NT” stands for non-tumor component.

**Figure S7.2.** Heatmaps for the common gene pool in both VEGF signal transduction pathway and the network of *NR5A2* in 91A cohort. “NT” stands for non-tumor component.

**Figure S7.3.** Heatmaps for the common gene pool in both p53 signal transduction

pathway and the network of *NR5A2* in 91A cohort. “NT” stands for non-tumor component.

**Figure S7.4.** Heatmaps for the common gene pool in both ribosomes and the network of *NR5A2* in 91A cohort. “NT” stands for non-tumor component.

**Figure S7.5.** Heatmaps for the common gene pool in both PDGFRB signal transduction pathway and the network of *NR5A2* in 91A cohort. “NT” stands for non-tumor component.

**Figure S7.6.** Heatmaps for the common gene pool in both ERBB2 signal transduction pathway and the network of *NR5A2* in 91A cohort. “NT” stands for non-tumor component.

**Figure S7.7.** Heatmaps for the common gene pool in both proteasomes and the network of *NR5A2* in 91A cohort. “NT” stands for non-tumor component.

**Figure S7.8.** Heatmaps for the common gene pool in both ribosomes and the network of *NR5A2* in 181A cohort. “NT” stands for non-tumor component.

**Figure S7.9.** Heatmaps for the common gene pool in both VEGF signal transduction pathway and the network of *NR5A2* in 181A cohort. “NT” stands for non-tumor component.

**Figure S7.10.** Heatmaps for the common gene pool in both cell cycle signal transduction pathway and the network of *NR5A2* in 181A cohort. “NT” stands for non-tumor component.

**Figure S7.11.** Heatmaps for the common gene pool in both ERBB2 signal transduction pathway and the network of *NR5A2* in 181A cohort. “NT” stands for non-tumor component.

**Figure S7.12.** Heatmaps for the common gene pool in both PDGFRB signal transduction pathway and the network of *NR5A2* in 181A cohort. “NT” stands for non-tumor component.

#### **Suppl. 8. (page 96)**

**Figure S8.1.** The heatmaps for the expression pattern of sixteen probes in relation to the gene expression patterns of the transcription factor (*NR5A2*) in two cohorts.

**Figure S8.2.** Survival curves of 15 probes within the prognostic signature.

#### **Suppl. 9. (pages 97-111)**

**Figure S9.1.** The prognostic prediction of BATF(6776), CREBL(878), FOXP1(14511), GATA5(3413), GTF3C1(17400), STAT2(2002), ESRRA(5480), MYB(5586) and CYP19A1(9382) in different cohorts (90A cohort, 91A cohort, 181A

cohort) by Kaplan-Meier survival analysis. The survival curves for CYP19A1(9382) in 77A cohort is also included. 6776, 878, 14511, 3413, 17400, 2002, 5480, 5586 and 9382 are the Agilent feature number for *BATF*, *CREBL*, *FOXPI*, *GATA5*, *GTF3C1*, *STAT2*, *ESRRA*, *MYB* and *CYP19A1*, respectively.

**Figure S9.2.** The prognostic prediction of NR5A1(652) in different cohorts (90A cohort, 91A cohort, 181A cohort) by Kaplan-Meier survival analysis. 652 is the Agilent feature number for NR5A1.

**Figure S9.3.** Mean plot analyses of mRNA levels for NR5A1(652), NR5A2 (16670) in eight clinical categories, respectively.

Lymphovascular invasion (LVI), nodal category (lymph node metastasis (LYM), number of nodal metastasis (LNM)), histological grade (Grade) category (nuclear pleomorphism (NP) and tubule formation (TF)) and stage were analyzed. Cohort 1 (90A) has ER(+) subtypes. Cohort 2 (91A) has ER(−) subtypes (see main text for definitions). Cohort 3 (181A) has cohorts 1 and 2.

#### **Suppl. 10. (pages 112-116)**

**Figure S10.1.** Heatmaps for the common transcription factor pool in both histological grade and clinically significant\_cohort enriched network of *NR5A2* in 181 IDCs (i.e. 181A) (see Table S2.1).

**Figure S10.2.** Heatmaps for the common transcription factor pool in both mitotic count and clinically significant\_cohort enriched network of *NR5A2* in 181 IDCs (i.e. 181A) (see Table S2.2).

**Figure S10.3.** Heatmaps for the common transcription factor pool in both nuclear pleomorphism and clinically significant\_cohort enriched network of *NR5A2* in 181 IDCs (i.e. 181A) (see Table S2.3).

**Figure S10.4.** Heatmaps for the common gene pool in prognostic feature type IV of *NR5A1* and *NR5A2* – 292 probes in 181 IDCs (i.e. 181A) (see Table S6.6).

**Figure S10.5.** The potential pathophysiological activities driven by *NR5A1* and *NR5A2* in 181A cohort, respectively.

Six examples are shown by the pair wise comparison between subnetworks of *NR5A1* and *NR5A2* for six pathophysiological activities that are predicted to be regulated by *NR5A1* and *NR5A2*, respectively. They are cell cycle regulation (A), tumor progression and carcinogenesis (B), steroidogenesis (C), sustained angiogenesis (D), Warburg effect (E) and epithelial mesenchymal transition (EMT) (F).

The significant regulatory relationship between a transcription factors (e.g. *NR5A1*, *NR5A2*) and its inferred target gene are linked by an arrow tailed with a solid line. On the other hand, the insignificant one is linked by an arrow tailed with a dashed line. A

circle or rectangle colored in blue stands for the relatively high expression level of a gene of interest. A circle or rectangle colored in green stands for the relatively low expression level of a gene of interest. When an arrow shows up or down next to the individual pathophysiological activity of interest, it indicates activated or suppressed activity based on the comparison of the sum activities between both subnetworks for the pathophysiological event of interest.

**Table S10.1.** Univariate and multivariate analyses for survival on prognostic factors in 91A cohort and 181A cohort. The p values of tests in the Cox proportional hazard (COXPH) model to be less or equal to 0.05 are high-lighted with light blue.

S1.1

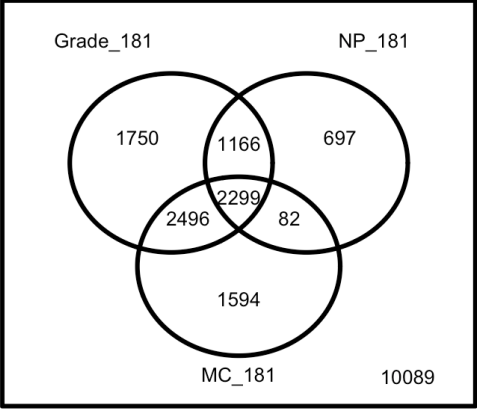

S1.2

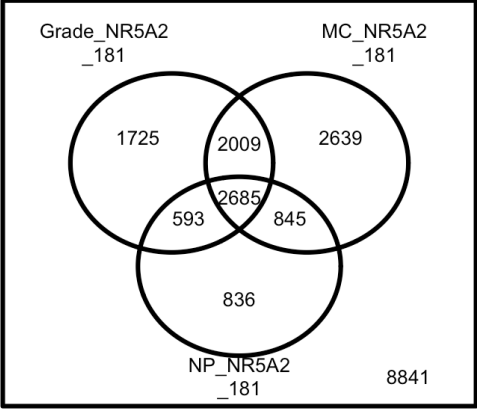

S1.3

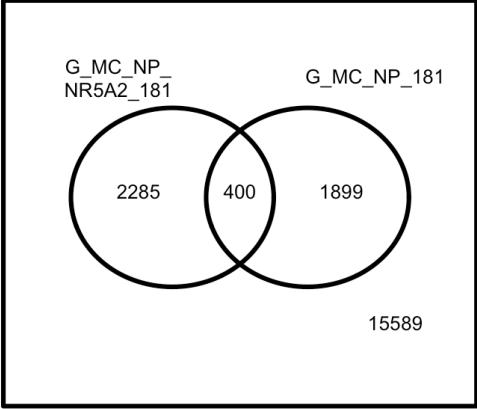

S1.4

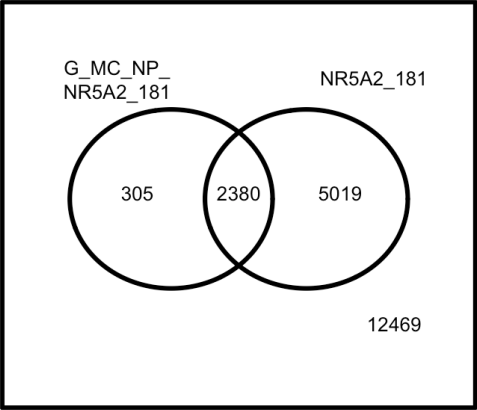

S2.1

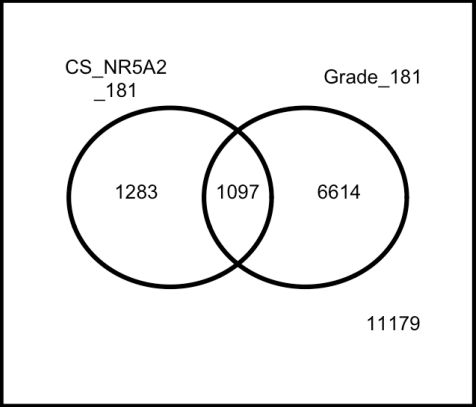

S2.2

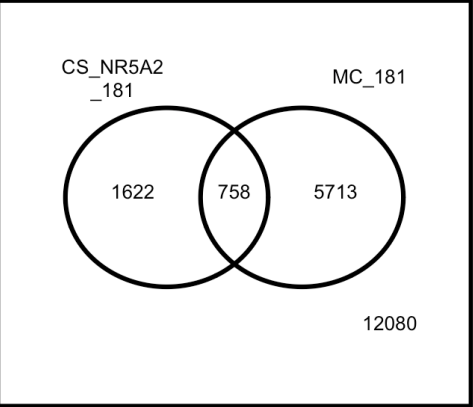

S2.3

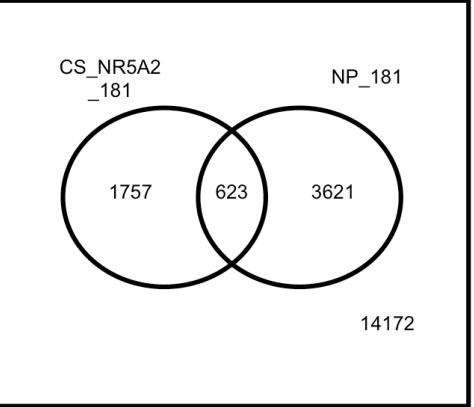

S2.4

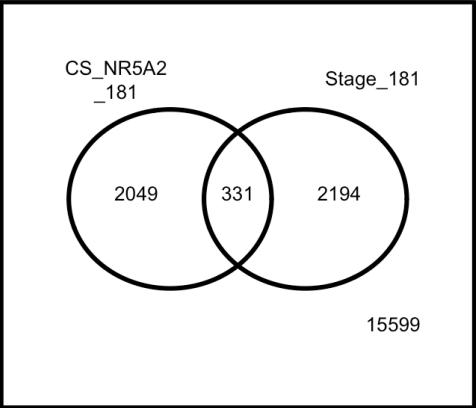

S2.5

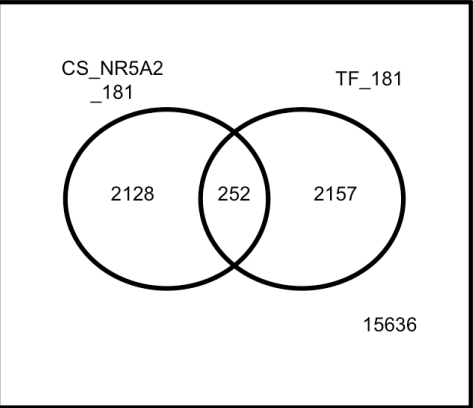

S2.6

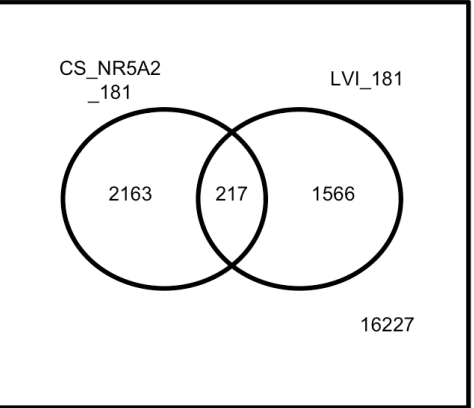

S2.7

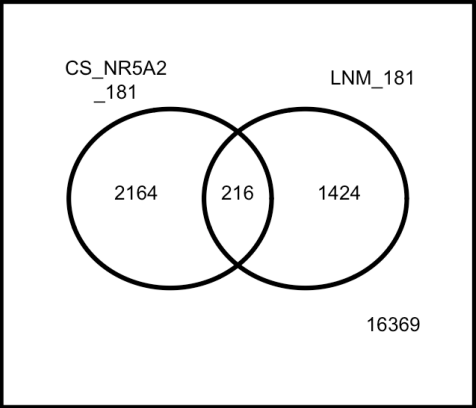

S2.8

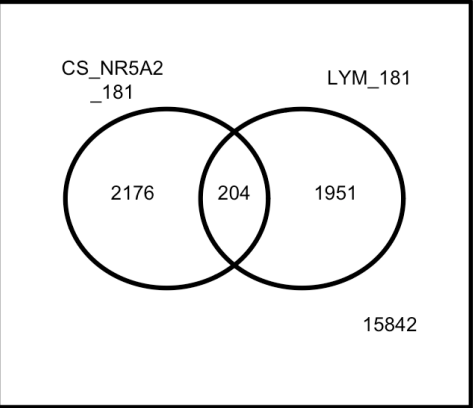

S2.9

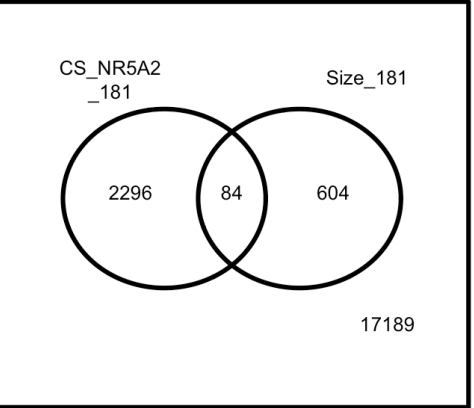

S2.10

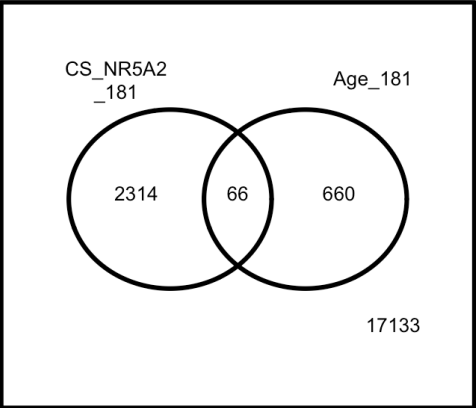

S3.1

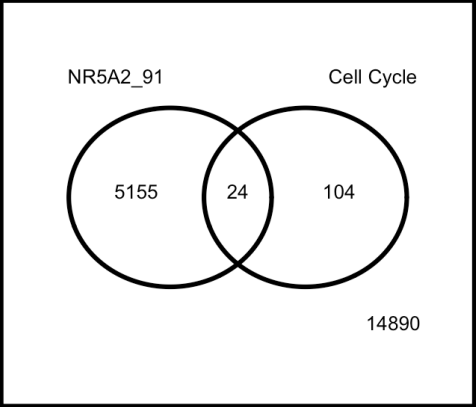

S3.2

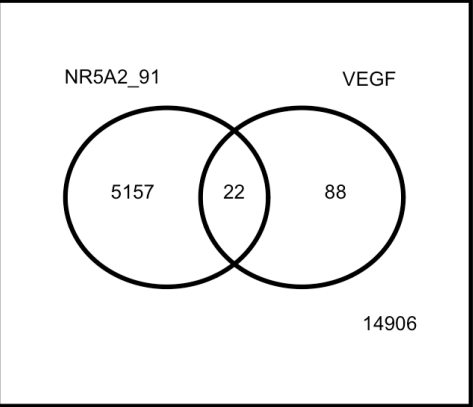

S3.3

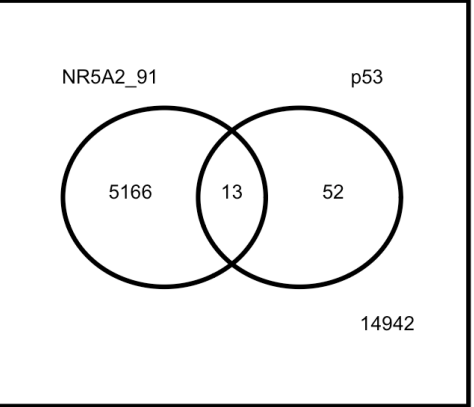

S3.4

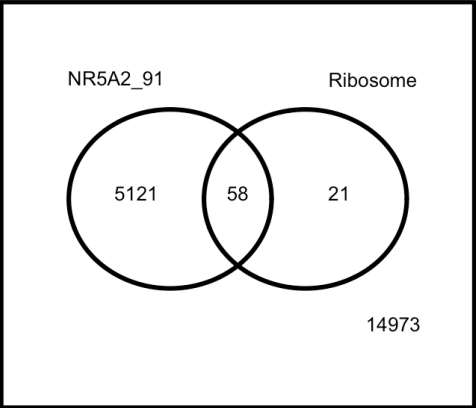

S3.5

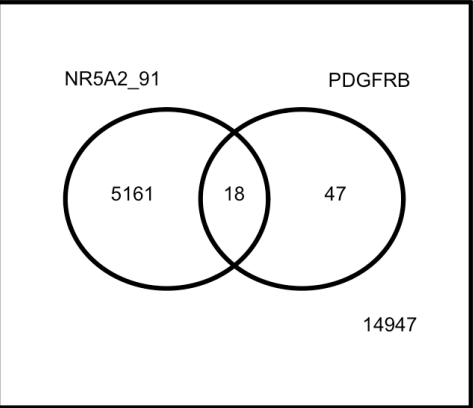

S3.6

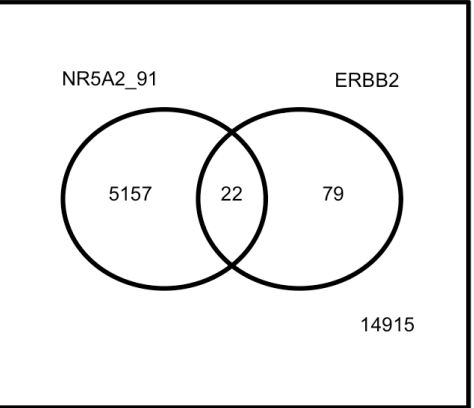

S3.7

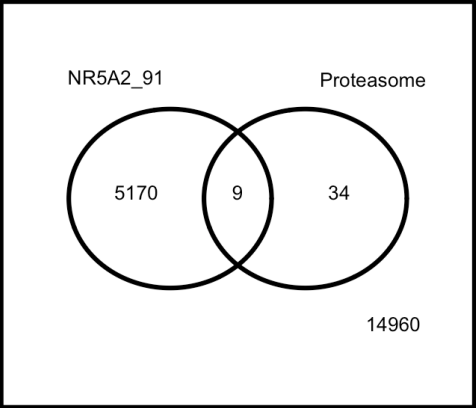

S3.8

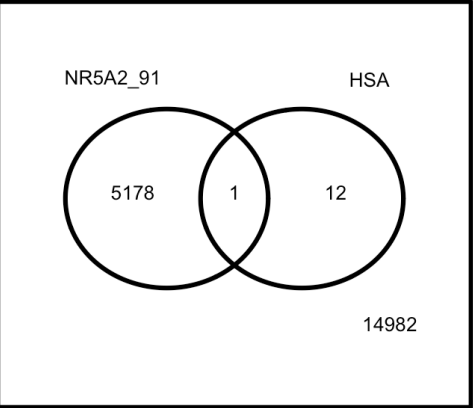

S3.9

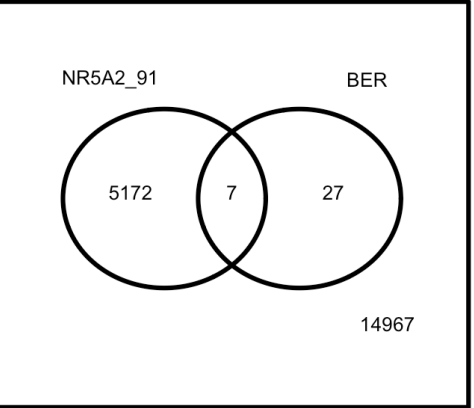

S3.10

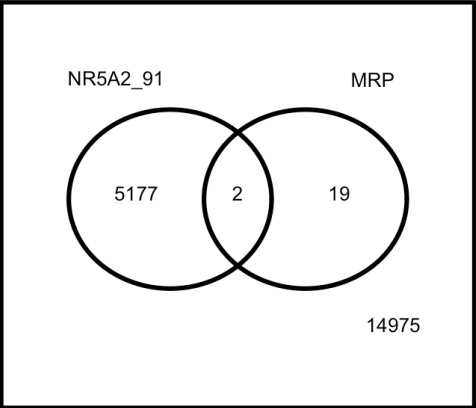

S3.11

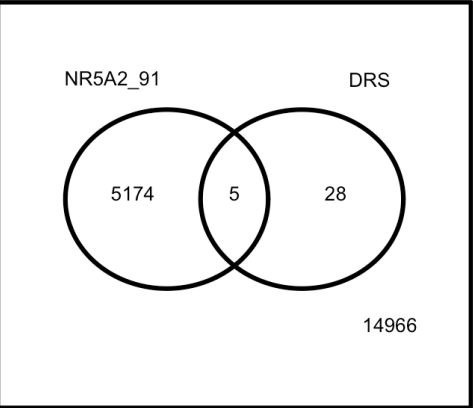

S3.12

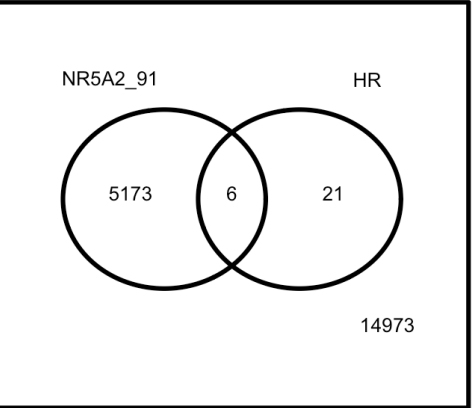

S3.13

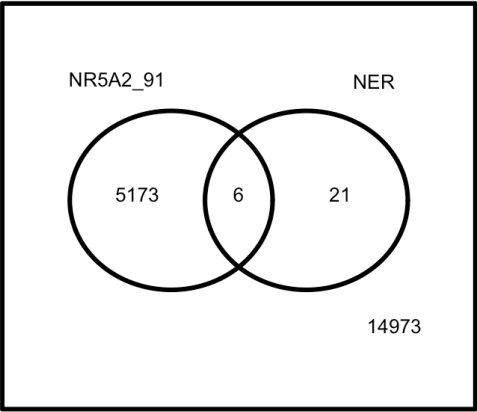

S4.1

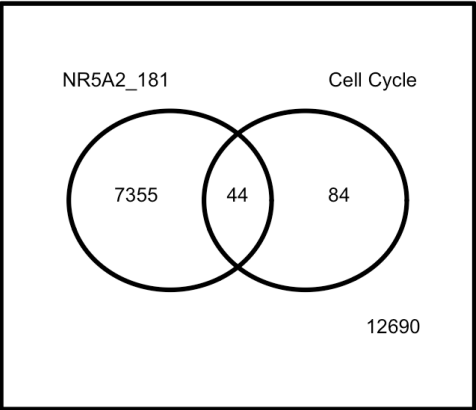

S4.2

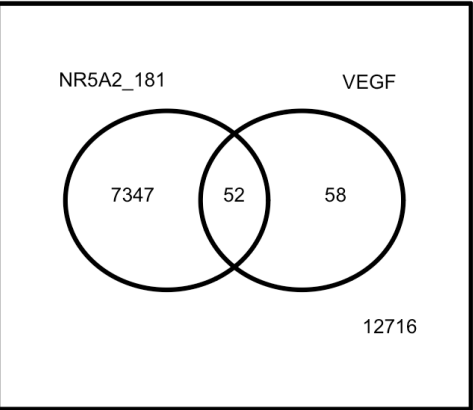

S4.3

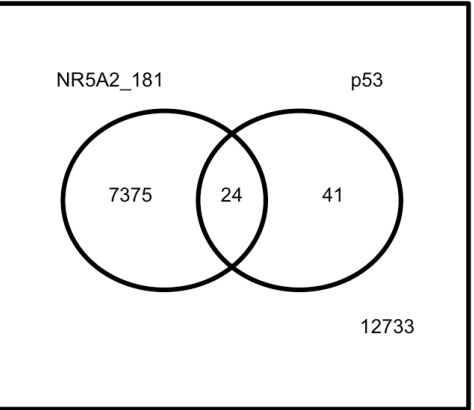

S4.4

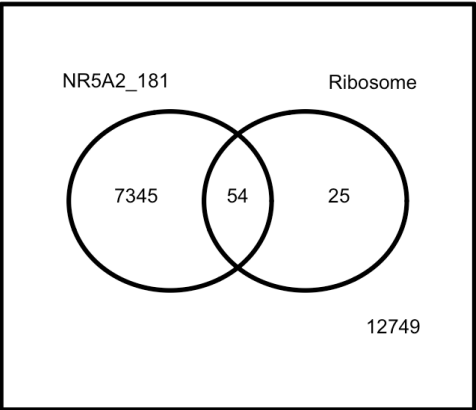

S4.5

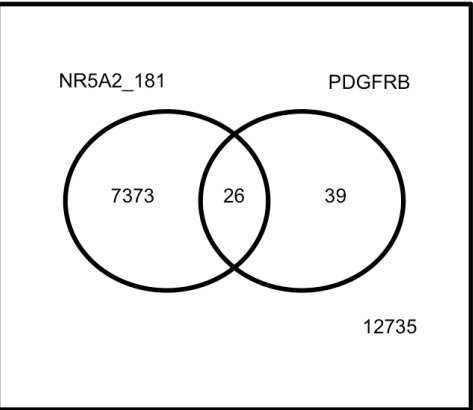

S4.6

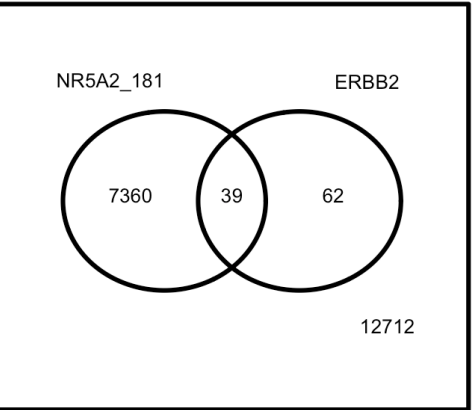

S4.7

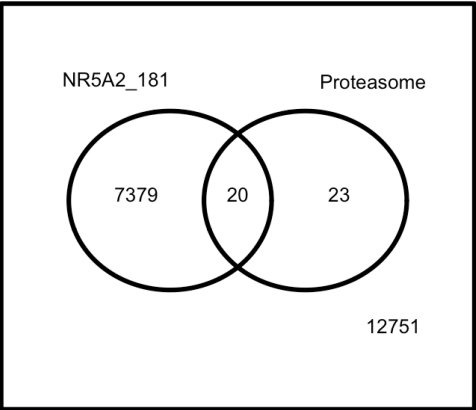

S4.8

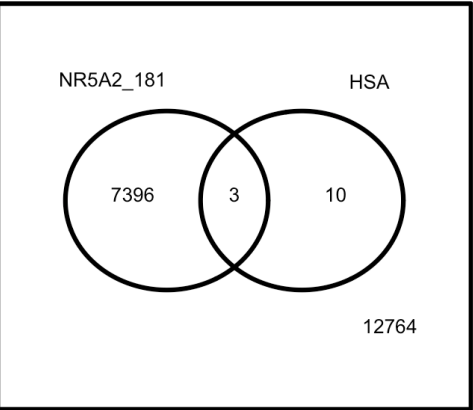

S4.9

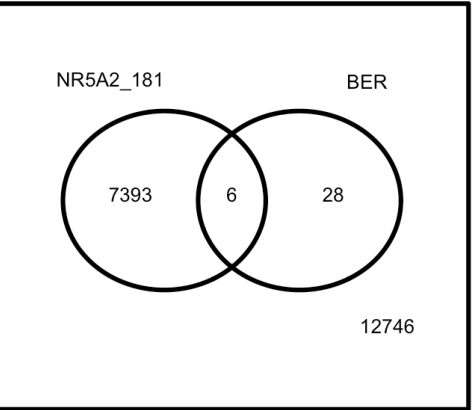

S4.10

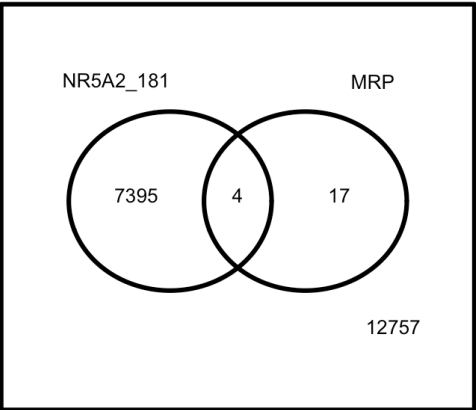

S4.11

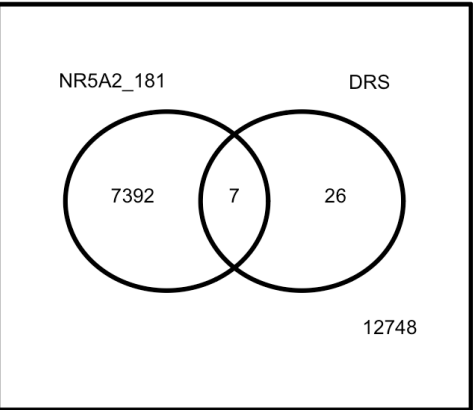

S4.12

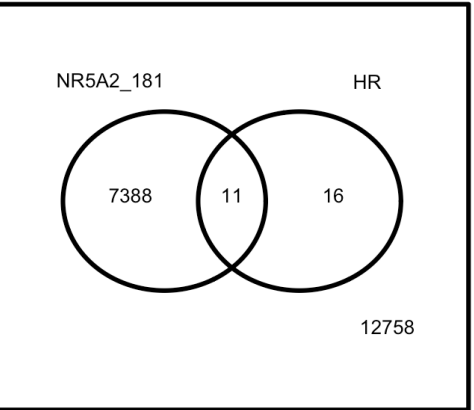

S4.13

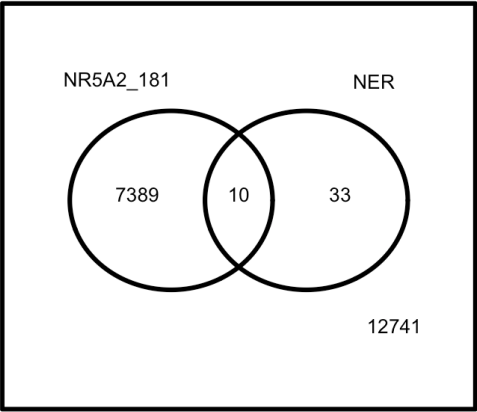

S5.1

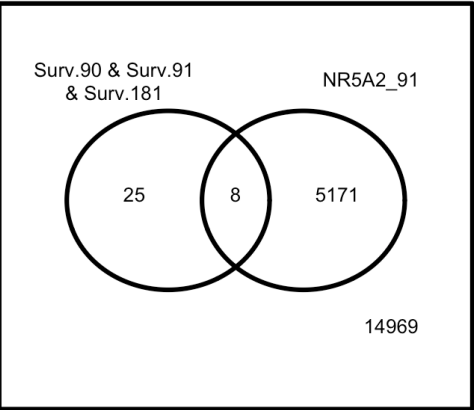

S5.2

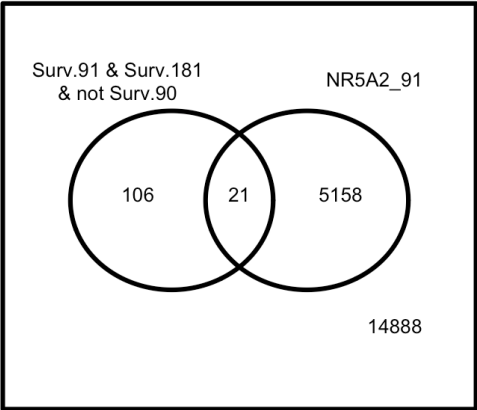

S5.3

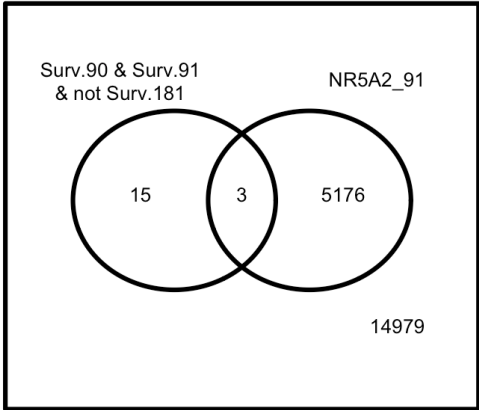

S5.4

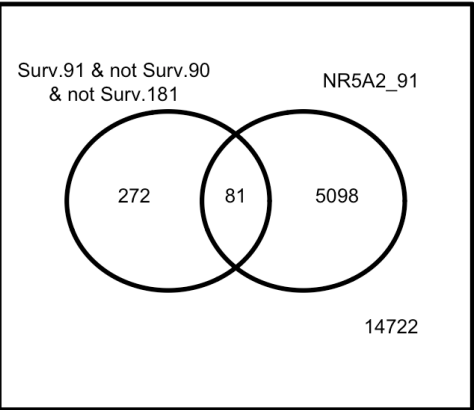

S5.5

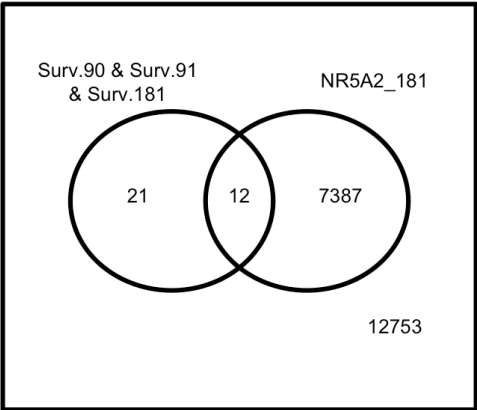

S5.6

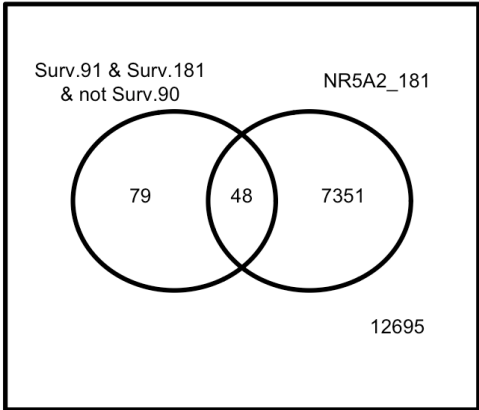

S5.7

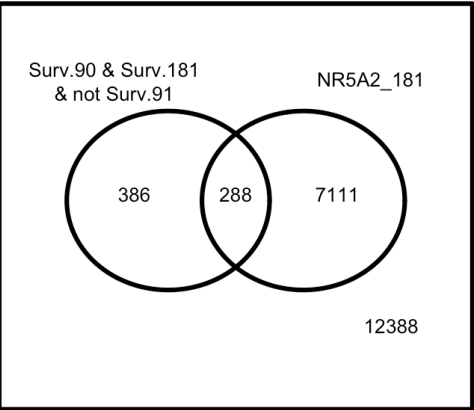

S5.8

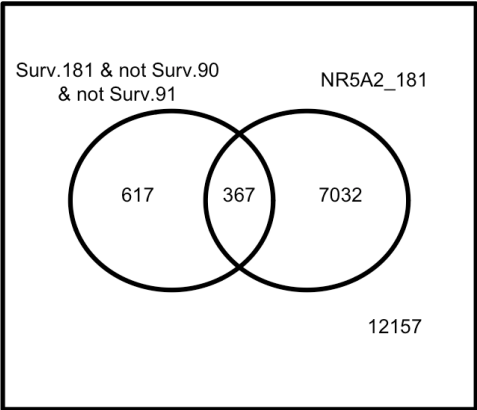

S5.9

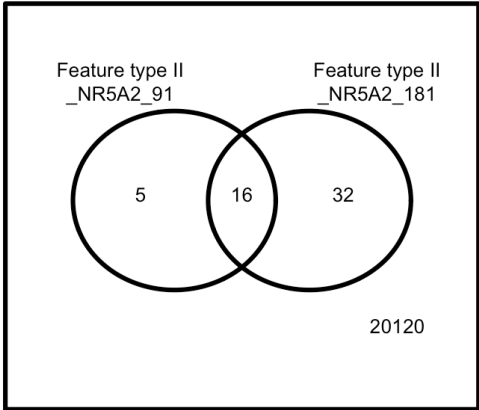

S6.1

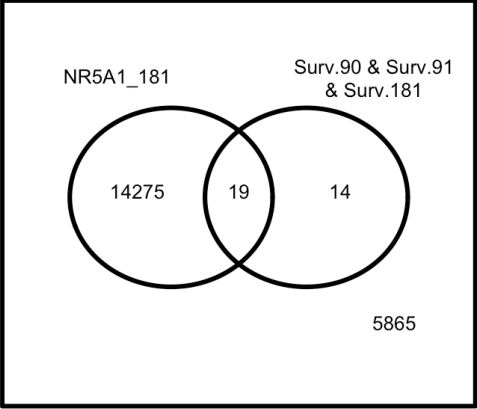

S6.2

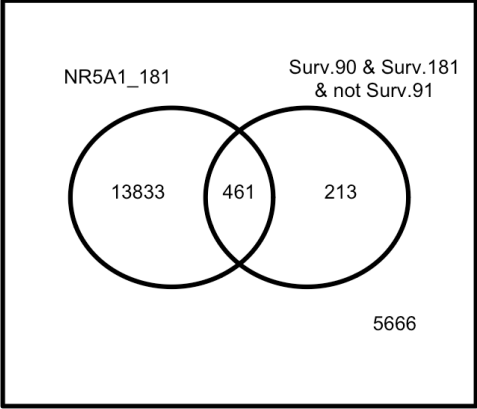

S6.3

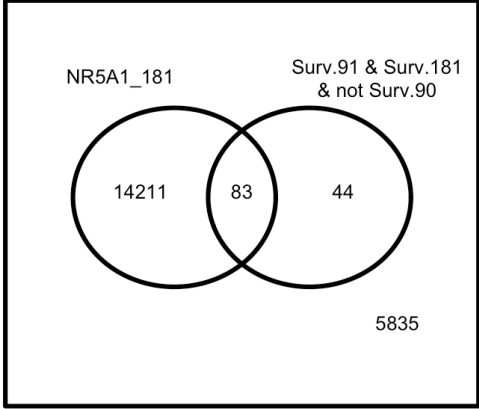

S6.4

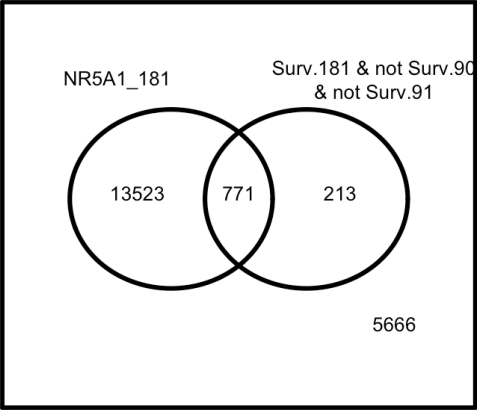

S6.5

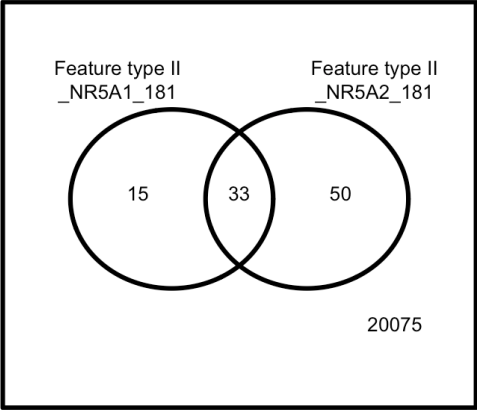

S6.6

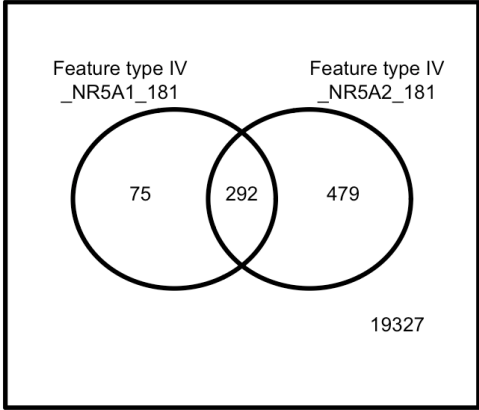

[illegible]

[illegible]

[illegible]

[illegible]

[illegible]





[illegible]

[illegible]

[illegible]

[illegible]

[illegible]

[illegible]



[illegible]

[illegible]

[illegible]

[illegible]

[illegible]

[illegible]

[illegible]

[illegible]

[illegible]

[illegible]



[illegible]

[illegible]

[illegible]

[illegible]

[illegible]

[illegible]

[illegible]

[illegible]

[illegible]

[illegible]

[illegible]



[illegible]

[illegible]

[illegible]



[illegible]

[illegible]

[illegible]



[illegible]



[illegible]

[illegible]



[illegible]

[illegible]

[illegible]

[illegible]

[illegible]

[illegible]

[illegible]

[illegible]

[illegible]

[illegible]

[illegible]

[illegible]

[illegible]

[illegible]

[illegible]

[illegible]

[illegible]



[illegible]

[illegible]

[illegible]

[illegible]

**Figure S7.1.** Heatmaps for the common gene pool in both cell cycle signal transduction pathway and the network of *NR5A2* in 91A cohort (ER-). “NT” stands for non-tumor component.

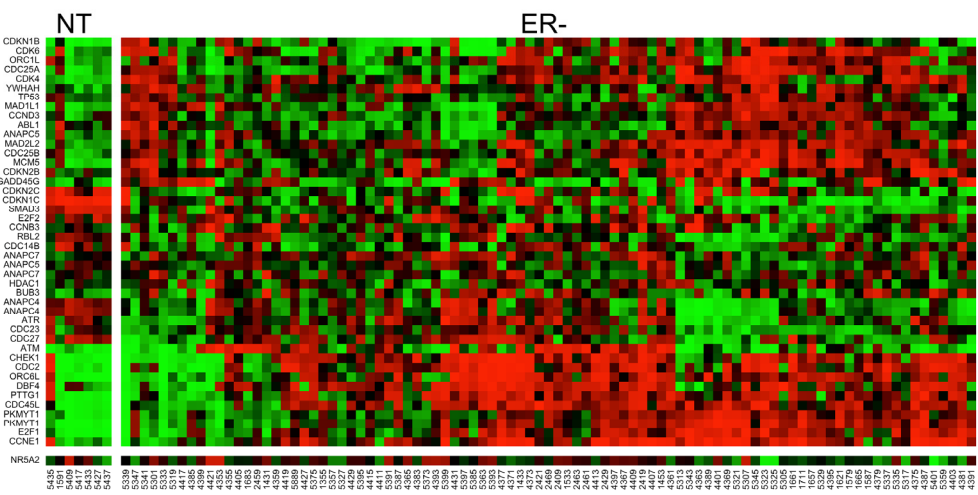

**Figure S7.2.** Heatmaps for the common gene pool in both VEGF signal transduction pathway and the network of *NR5A2* in 91A cohort (ER-). “NT” stands for non-tumor component.

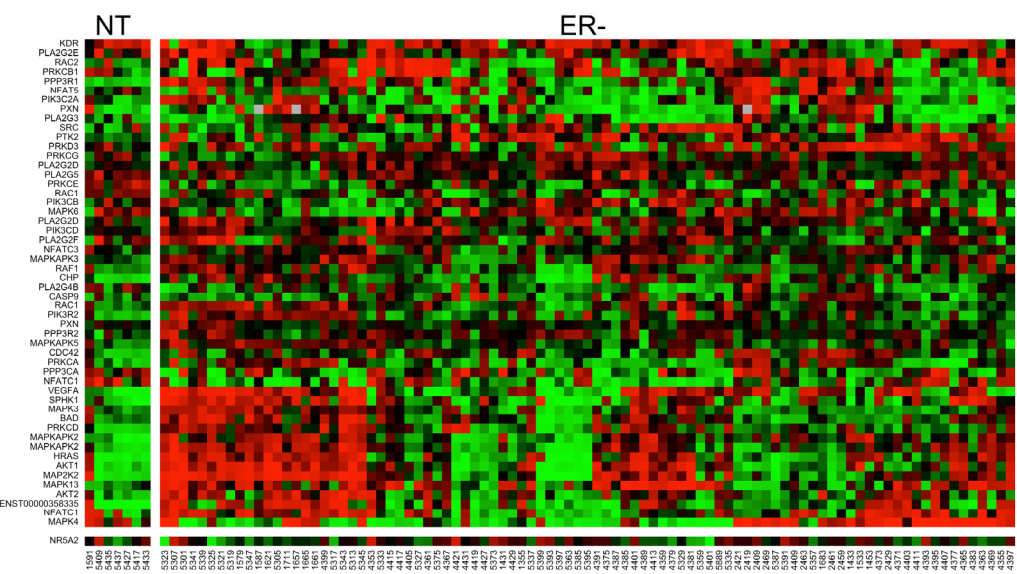



**Figure S7.5.** Heatmaps for the common gene pool in both PDGFRB signal transduction pathway and the network of *NR5A2* in 91A cohort (ER-). “NT” stands for non-tumor component.

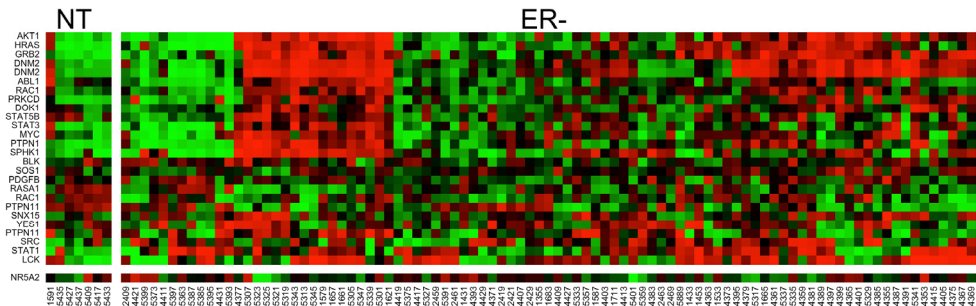

**Figure S7.6.** Heatmaps for the common gene pool in both ERBB2 signal transduction pathway and the network of *NR5A2* in 91A cohort (ER-). “NT” stands for non-tumor component.

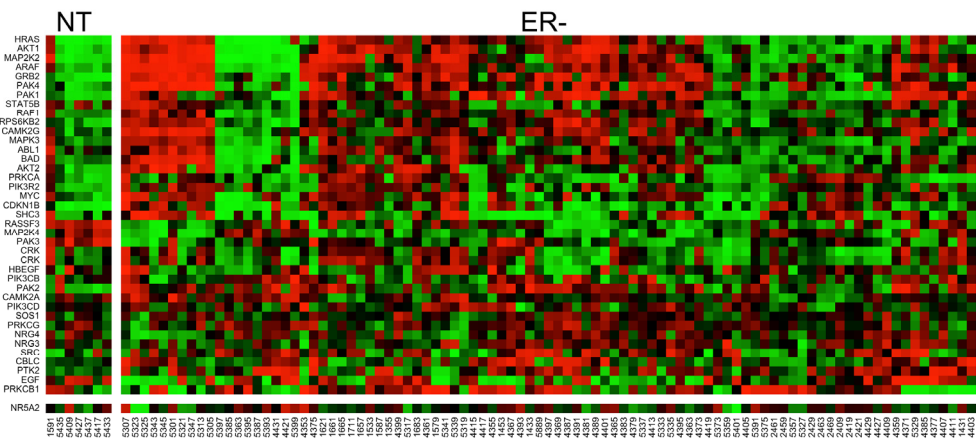

**Figure S7.7.** Heatmaps for the common gene pool in both proteasome and the network of *NR5A2* in 91A cohort (ER-). “NT” stands for non-tumor component.

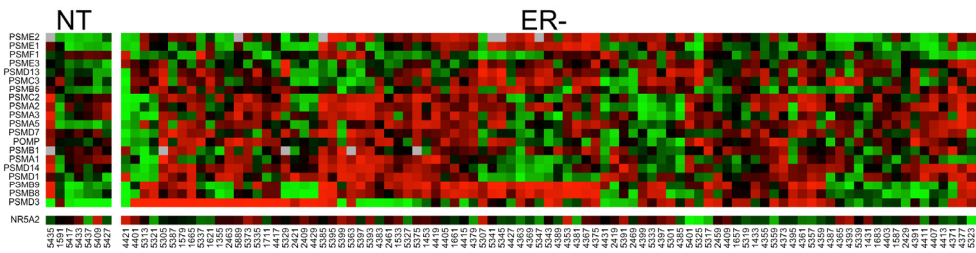

**Figure S7.8.** Heatmaps for the common gene pool in both ribosome and the network of *NR5A2* in 181A cohort. “NT” stands for non-tumor component. Many places are labeled with the “grey” color indicating data not available after data processing. The heatmaps are just for display purpose but not considered to be the acceptable data.

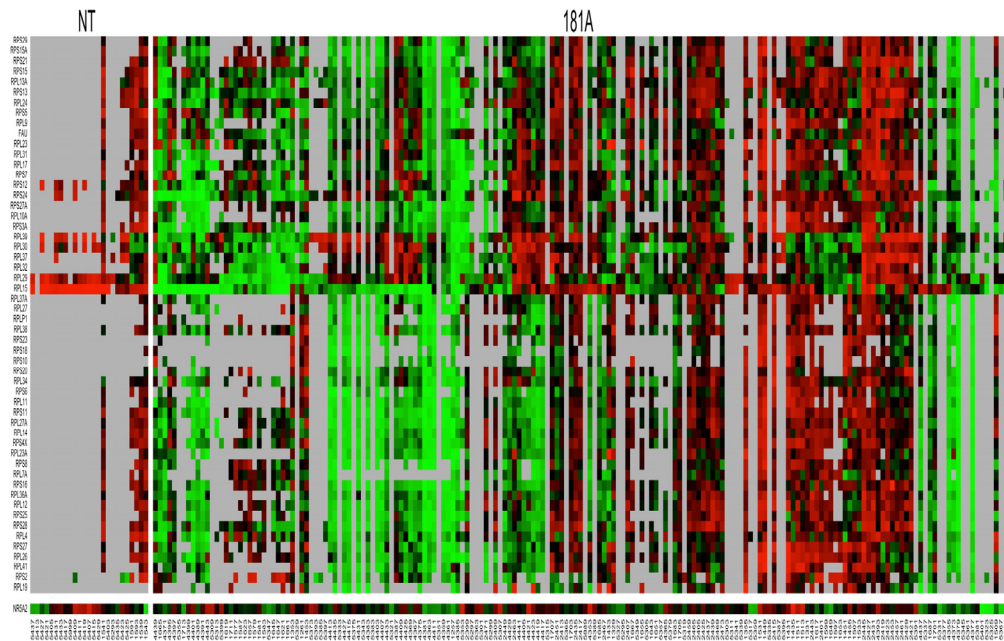







**Figure S8.1.** The heatmaps for the expression pattern of sixteen probes in relation to the gene expression patterns of the transcription factor (*NR5A2*) in two cohorts.

91A cohort

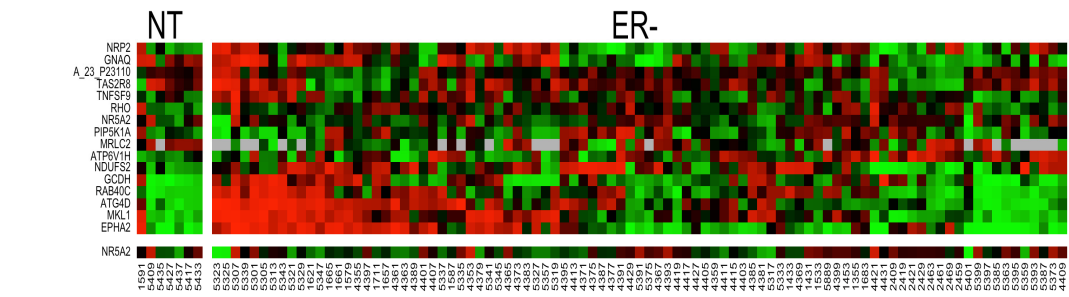

181A cohort

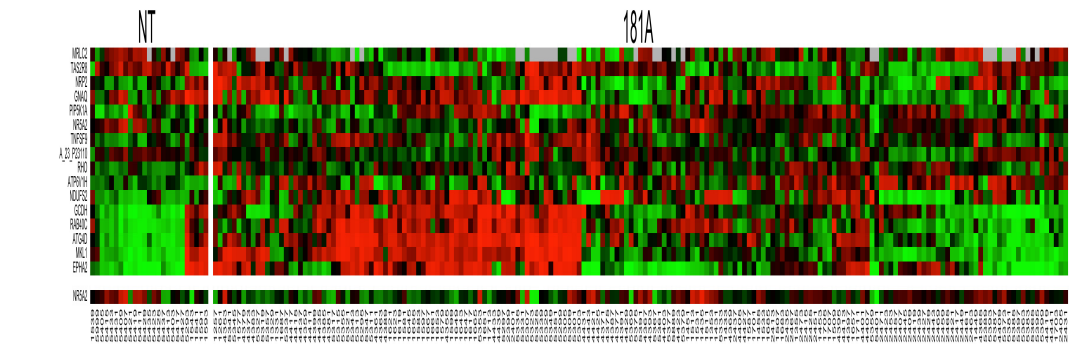

**Figure S9.1.** The prognostic prediction of BATF(6776), CREBL(878), FOXP1(14511), GATA5(3413), GTF3C1(17400), STAT2(2002), ESRRA(5480), MYB(5586) and CYP19A1(9382) in different cohorts (90A cohort, 91A cohort, 181A cohort) by Kaplan-Meier survival analysis. 6776, 878, 14511, 3413, 17400, 2002, 5480, 5586 and 9382 are the Agilent feature number for *BATF*, *CREBL*, *FOXP1*, *GATA5*, *GTF3C1*, *STAT2*, *ESRRA*, *MYB* and *CYP19A1*, respectively. An extra survival curve has been included for CYP19A1(9382) in 77A cohort. 77A cohort consists of 48 triple negatives (TN) and 29 ERBB2 breast tumors.

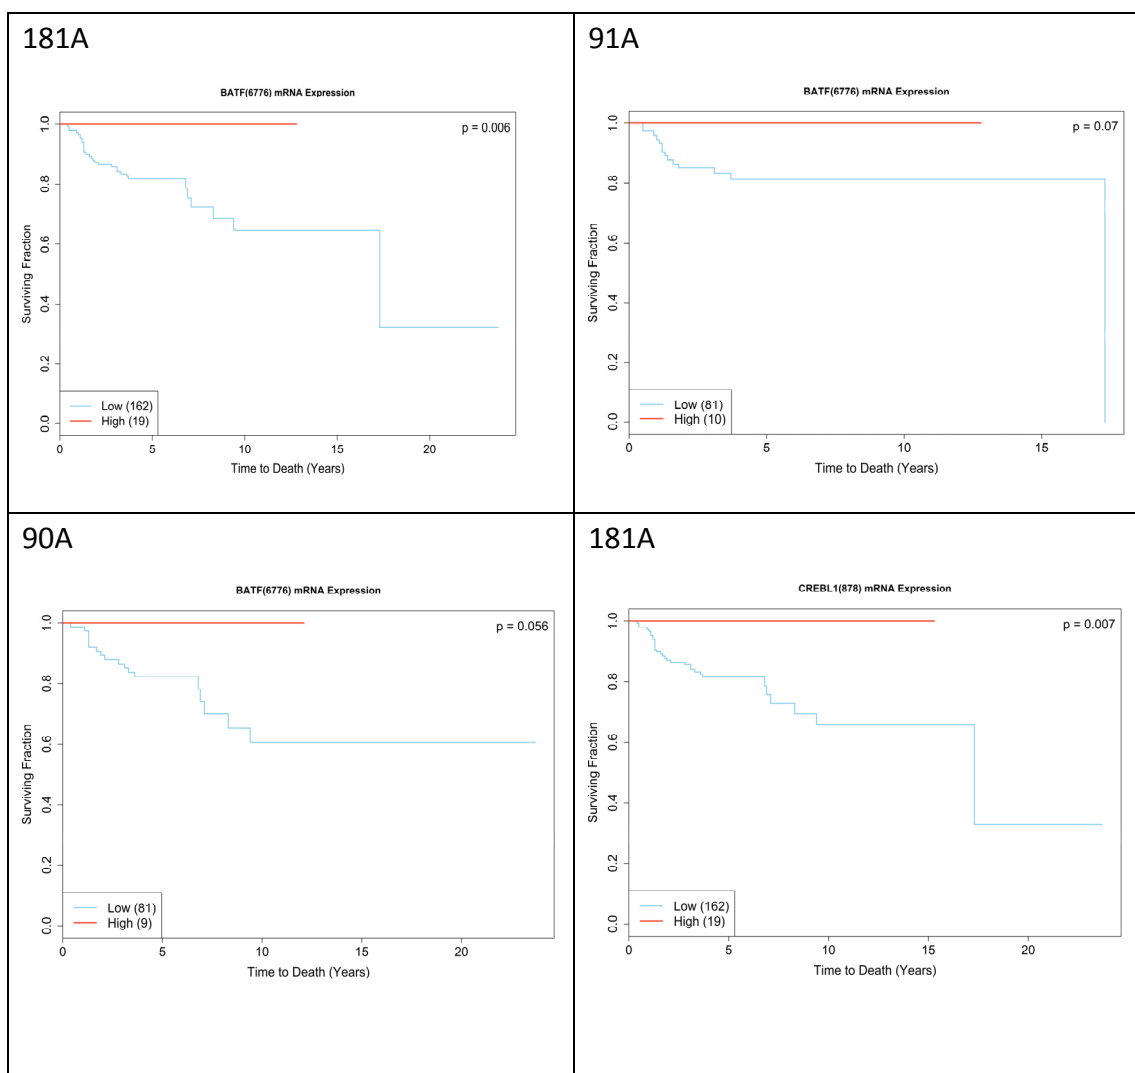

91A

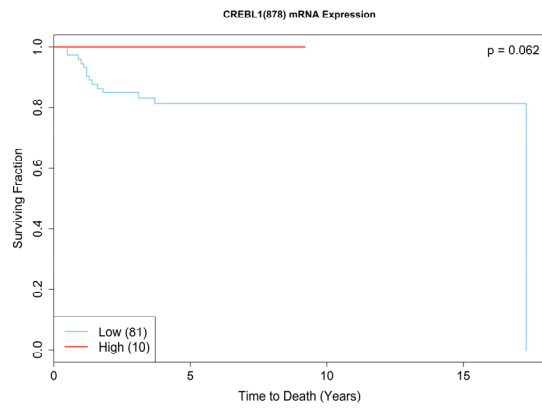

90A

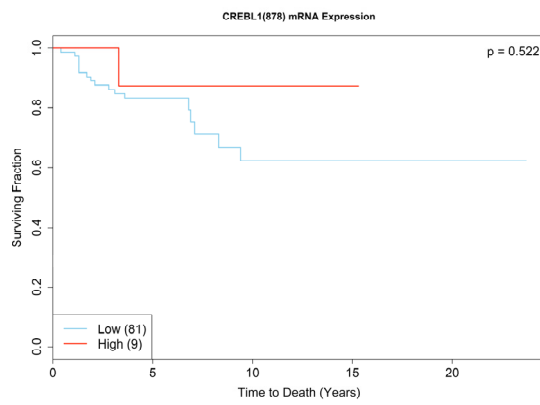

181A

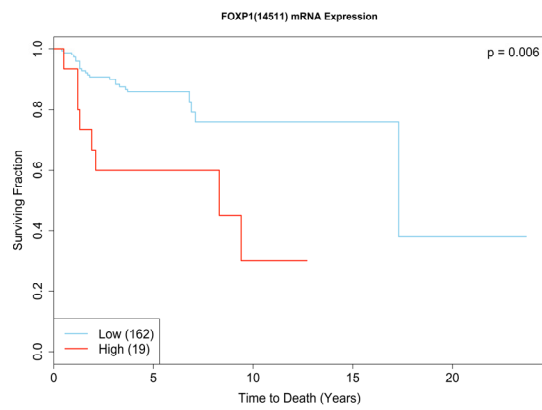

91A

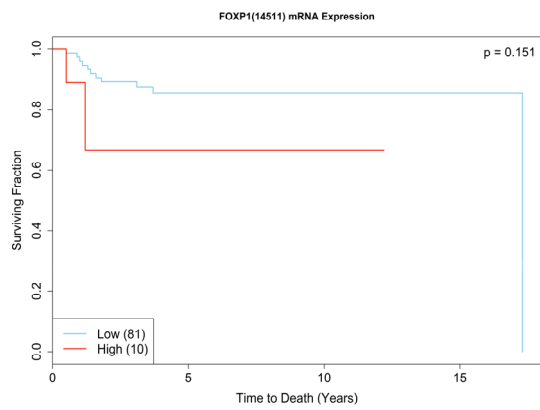

90A

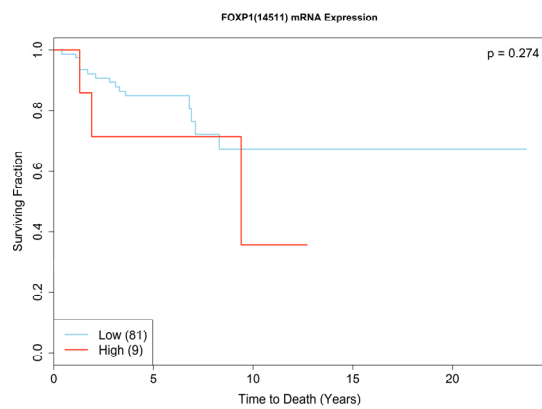

181A

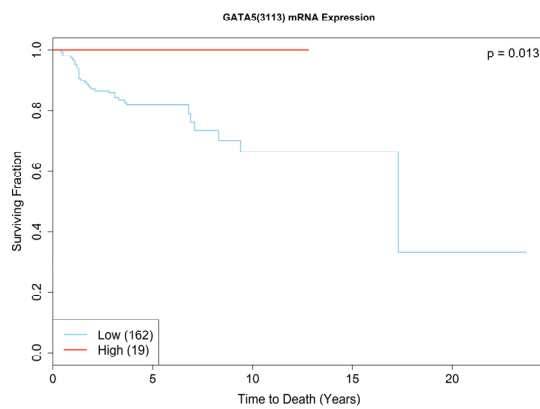

91A

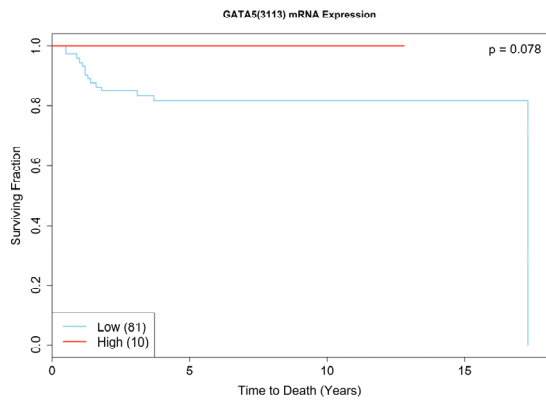

90A

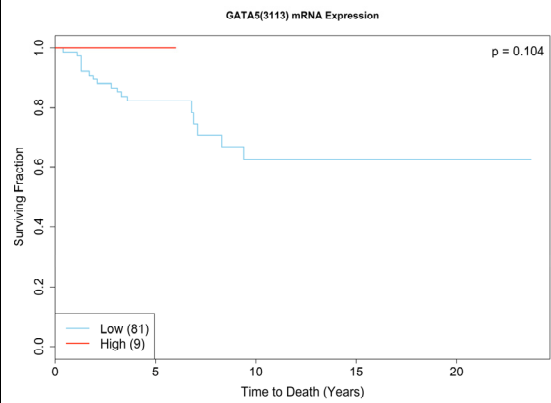

181A

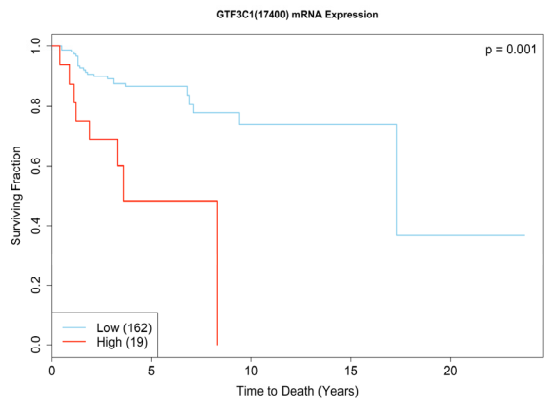

91A

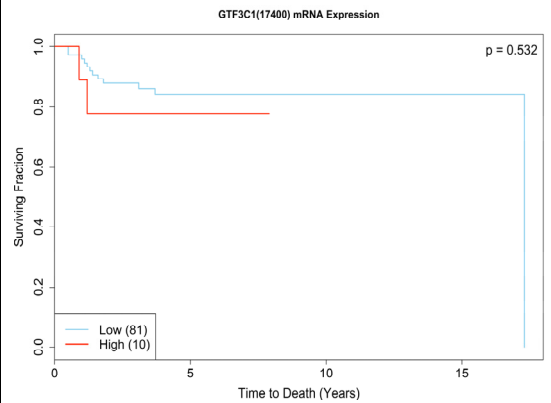

90A

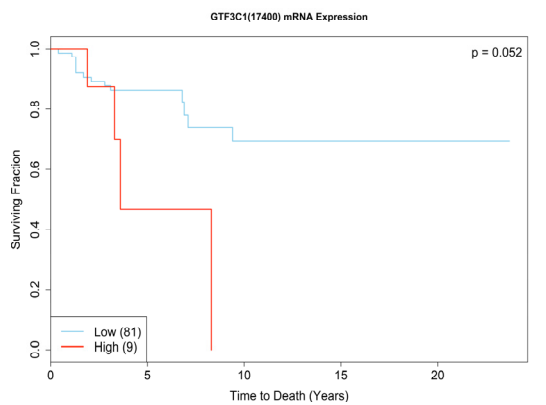

181A

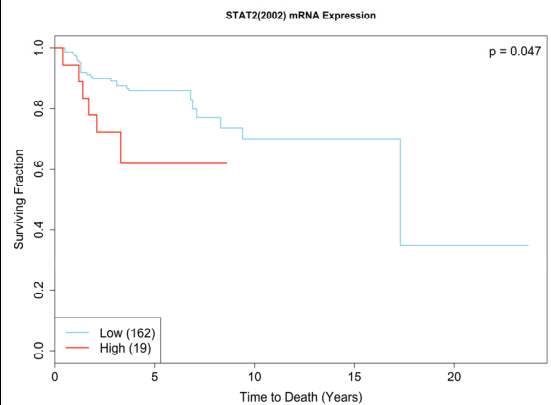

91A

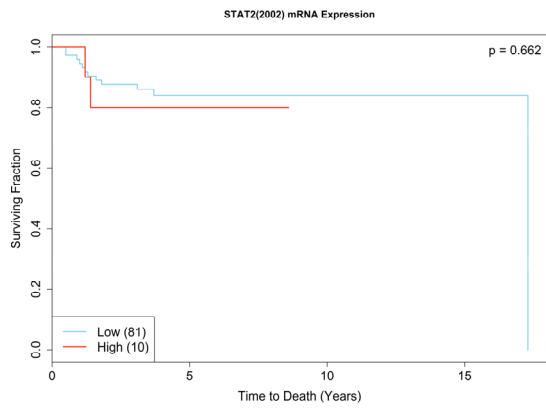

90A

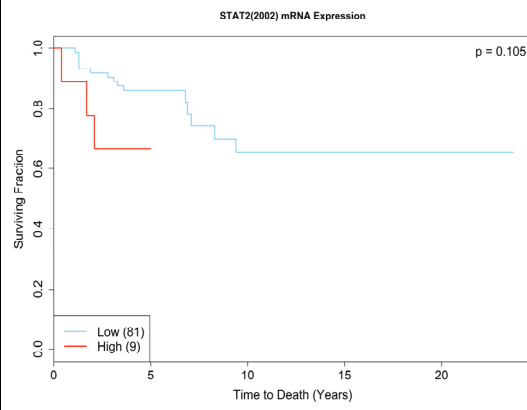

181A

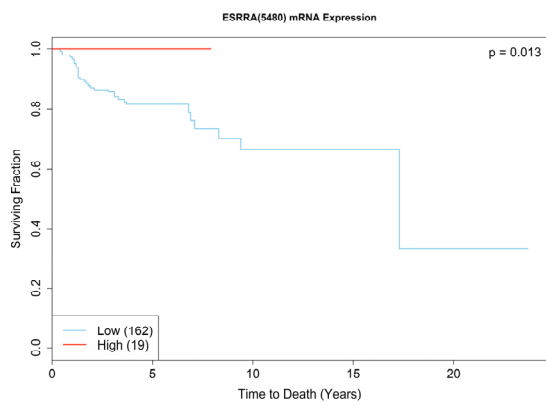

91A

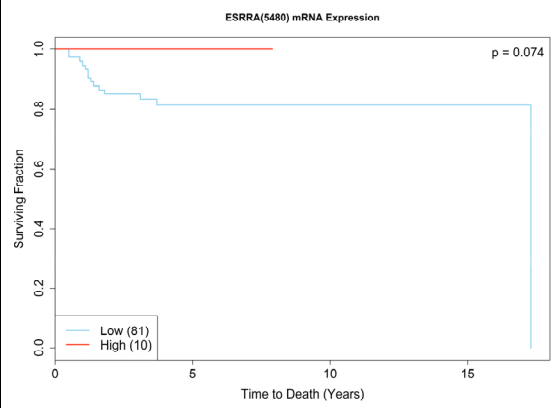

90A

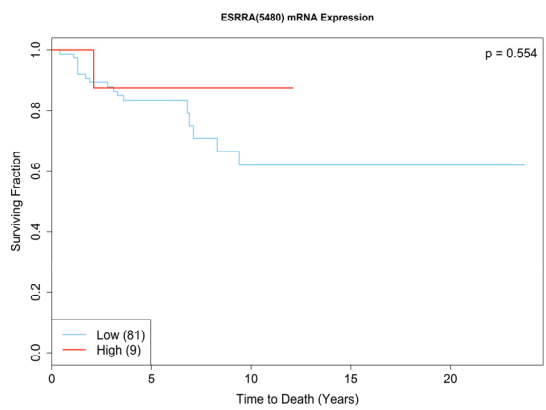

181A

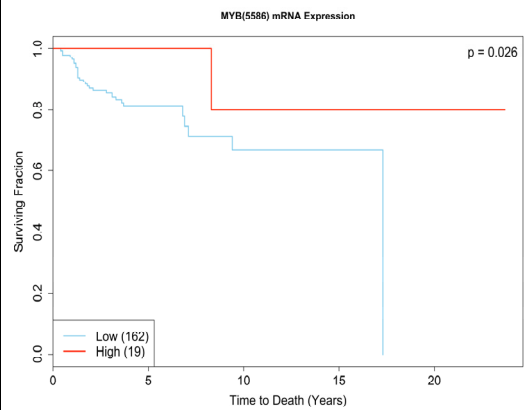

91A

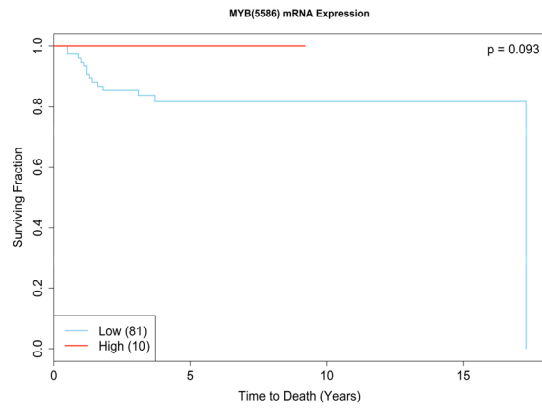

90A

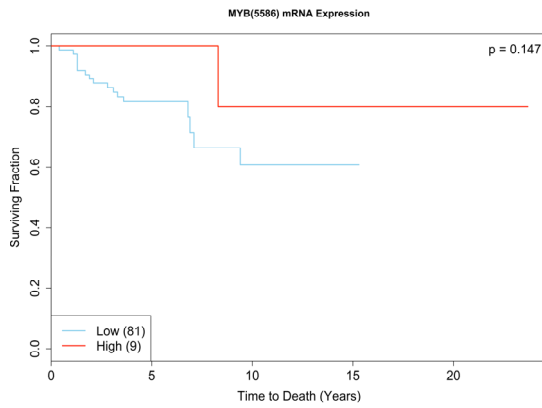

181A

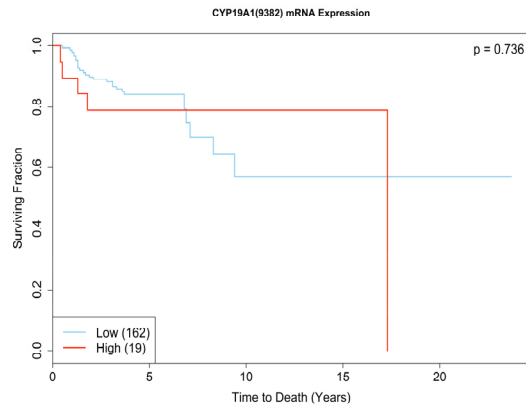

91A

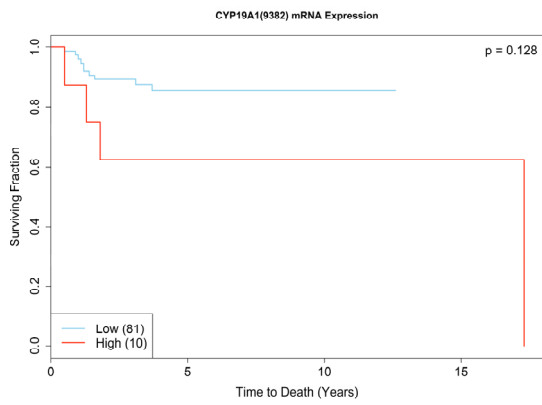

90A

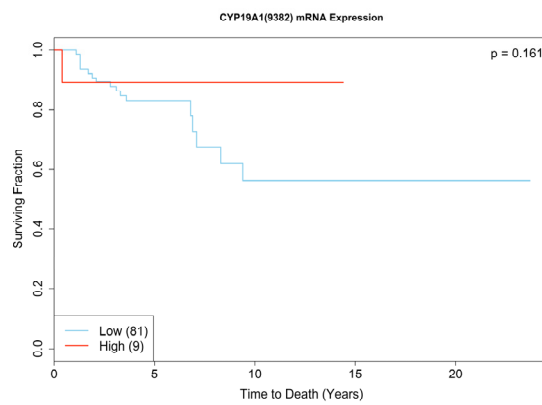

77A

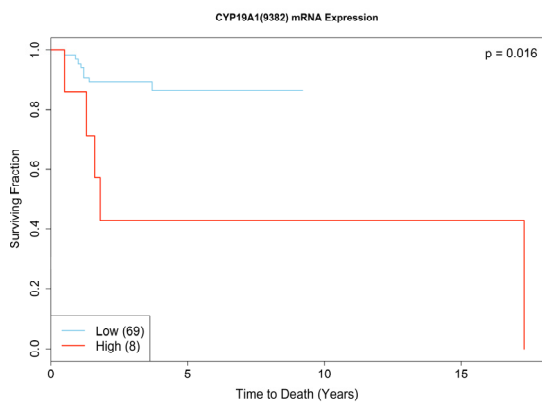

**Figure S9.2.** The prognostic prediction of NR5A1(652) in different cohorts (90A cohort, 91A cohort, 181A cohort) by Kaplan-Meier survival analysis. 652 is the Agilent feature number for NR5A1.

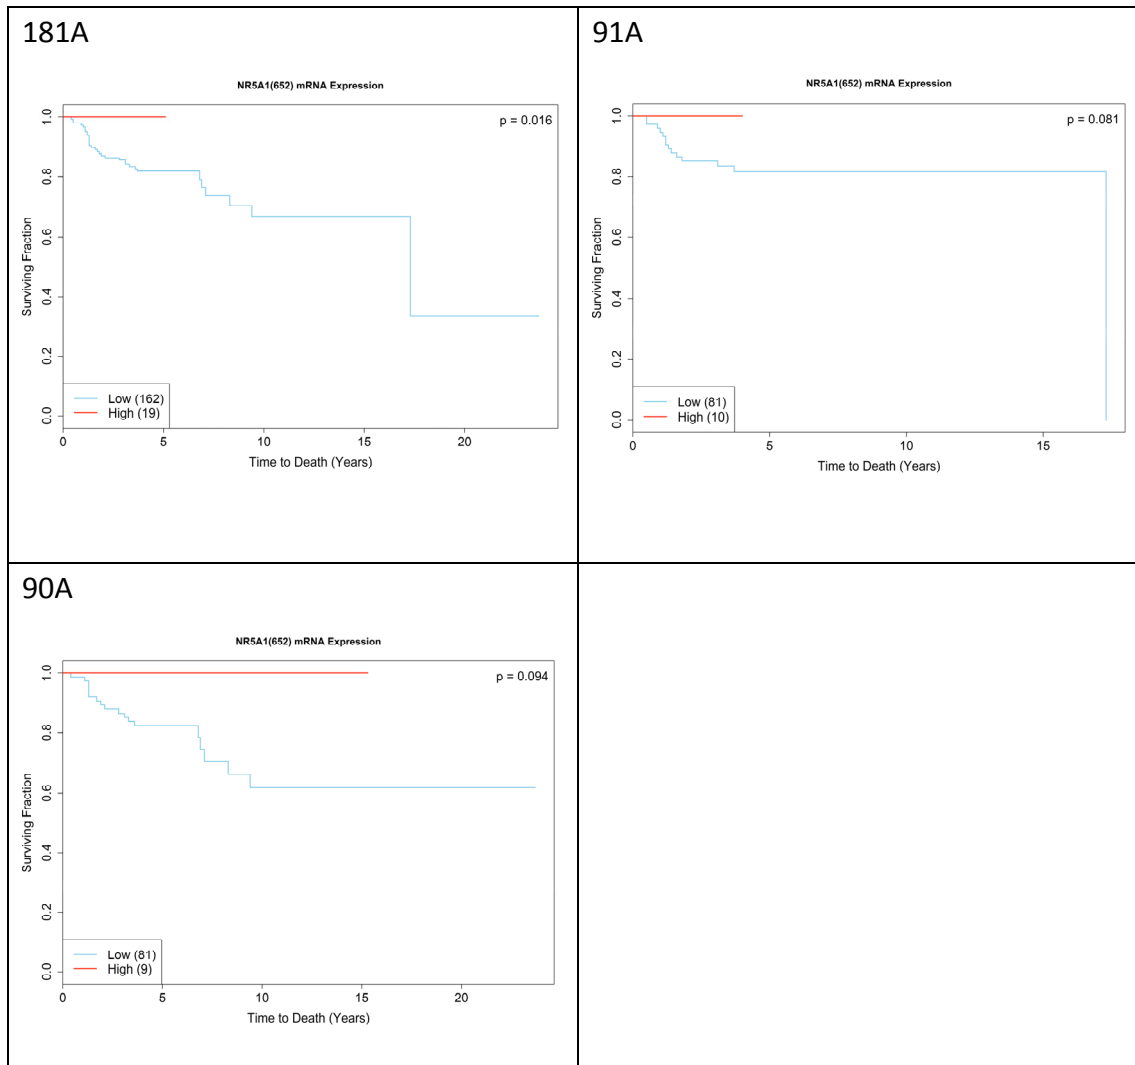

**Figure S9.3.** Mean plot analyses of mRNA levels for NR5A1(652), NR5A2 (16670) in eight clinical categories, respectively.

Lymphovascular invasion (LVI), nodal category (lymph node metastasis (LYM), number of nodal metastasis (LNM)), histological grade (Grade) category (nuclear pleomorphism (NP) and tubule formation (TF)) and stage were analyzed. Cohort 1 (90A) has ER(+) subtypes. Cohort 2 (91A) has ER(−) subtypes (see main text for definitions). Cohort 3 (181A) has cohorts 1 and 2.

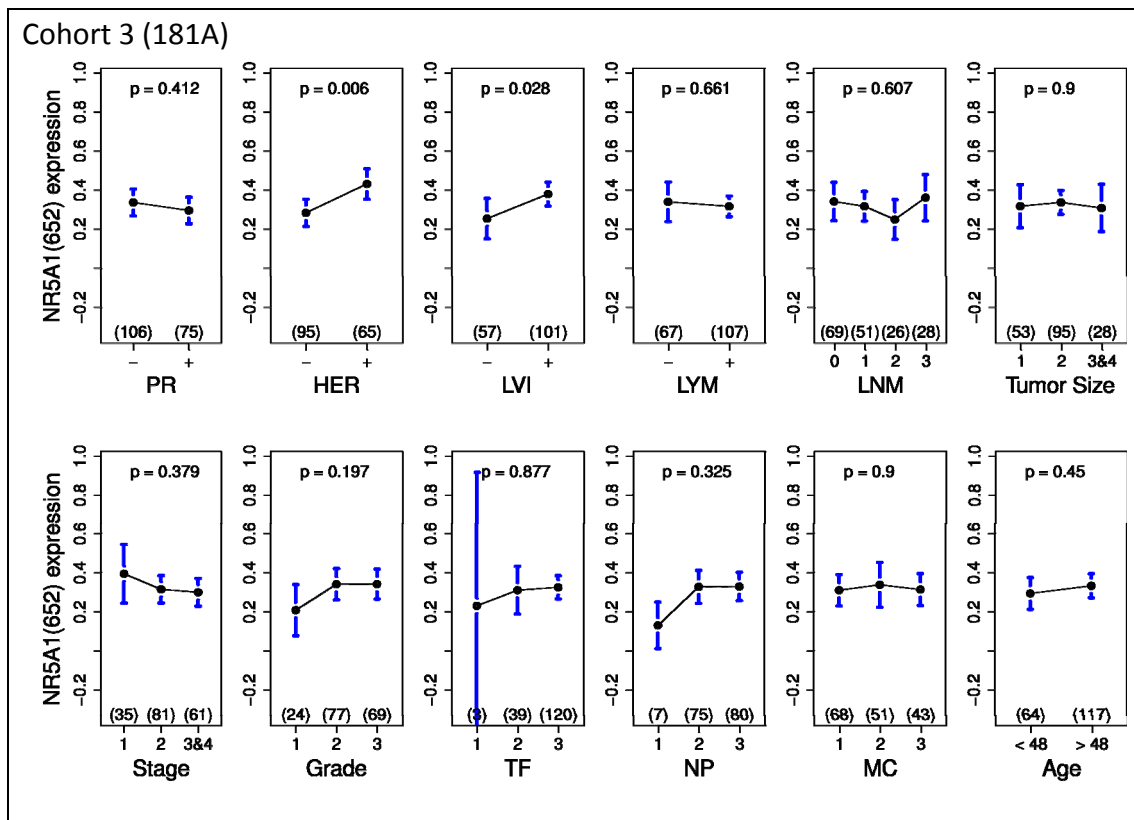

# Cohort 2 (91A)

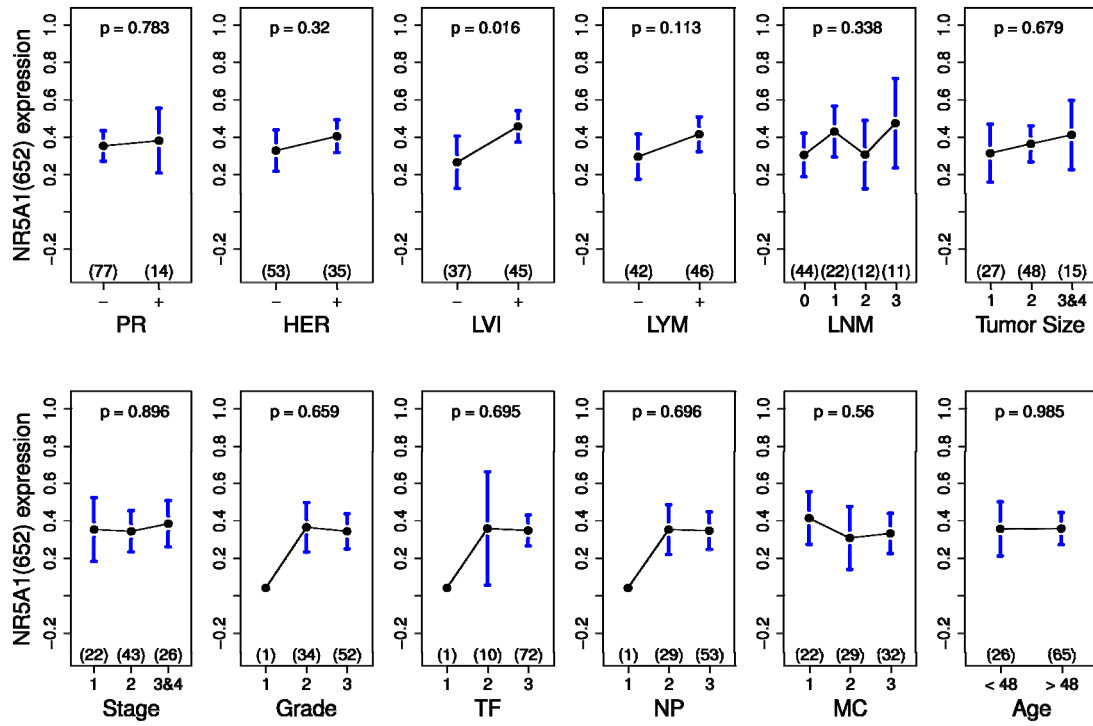

# Cohort 1(90A)

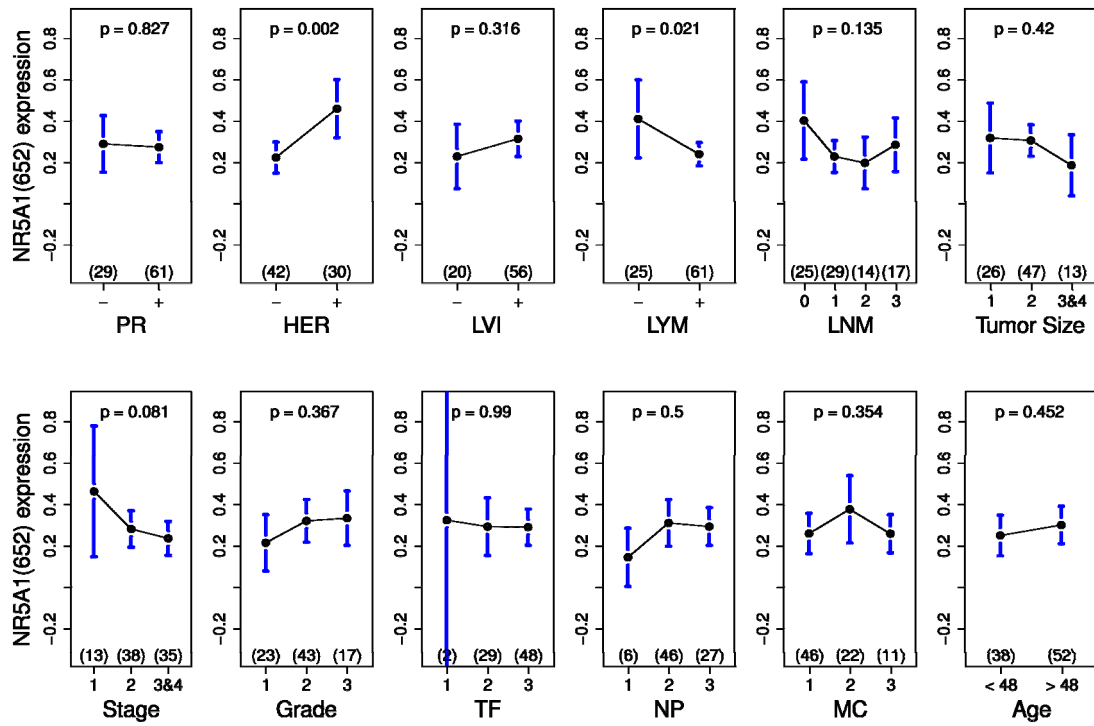

# Cohort 1 (90A)

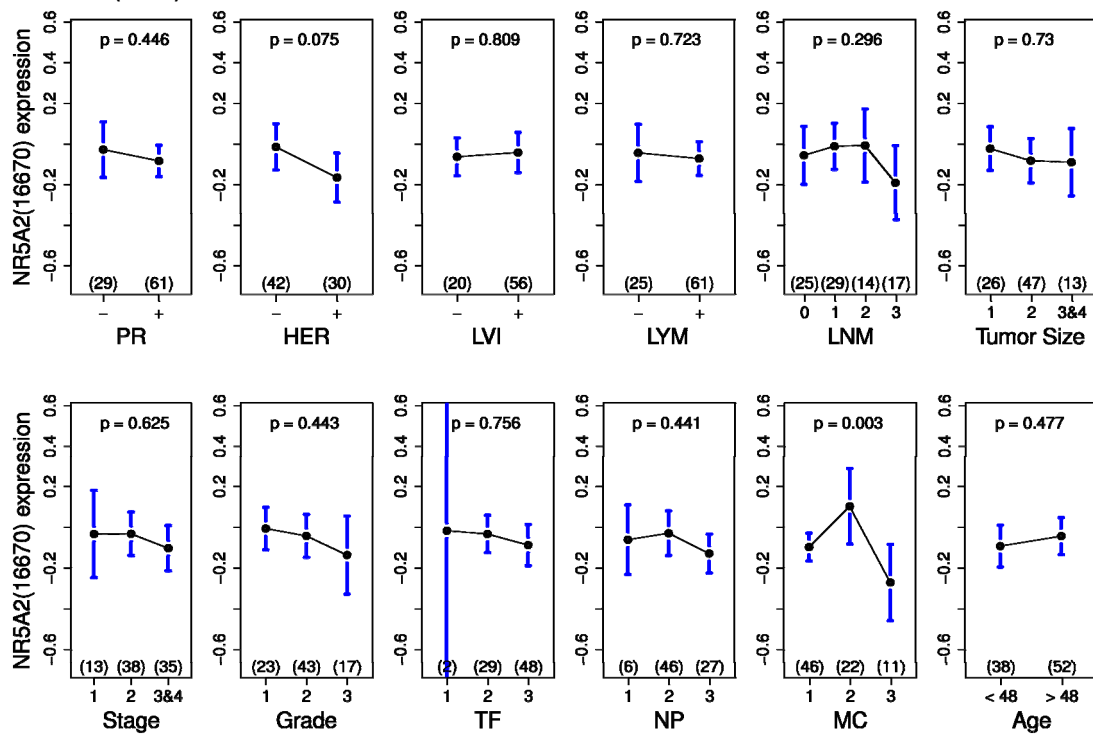

**Figure S9.2.** The prognostic prediction of NR5A1(652) in different cohorts (90A cohort, 91A cohort, 181A cohort) by Kaplan-Meier survival analysis. 652 is the Agilent feature number for NR5A1.



**Figure S9.3.** Mean plot analyses of mRNA levels for NR5A1(652), NR5A2 (16670) in eight clinical categories, respectively.

Lymphovascular invasion (LVI), nodal category (lymph node metastasis (LYM), number of nodal metastasis (LNM)), histological grade (Grade) category (nuclear pleomorphism (NP) and tubule formation (TF)) and stage were analyzed. Cohort 1 (90A) has ER(+) subtypes. Cohort 2 (91A) has ER(−) subtypes (see main text for definitions). Cohort 3 (181A) has cohorts 1 and 2.



# Cohort 2 (91A)



# Cohort 1(90A)



# Cohort 1 (90A)

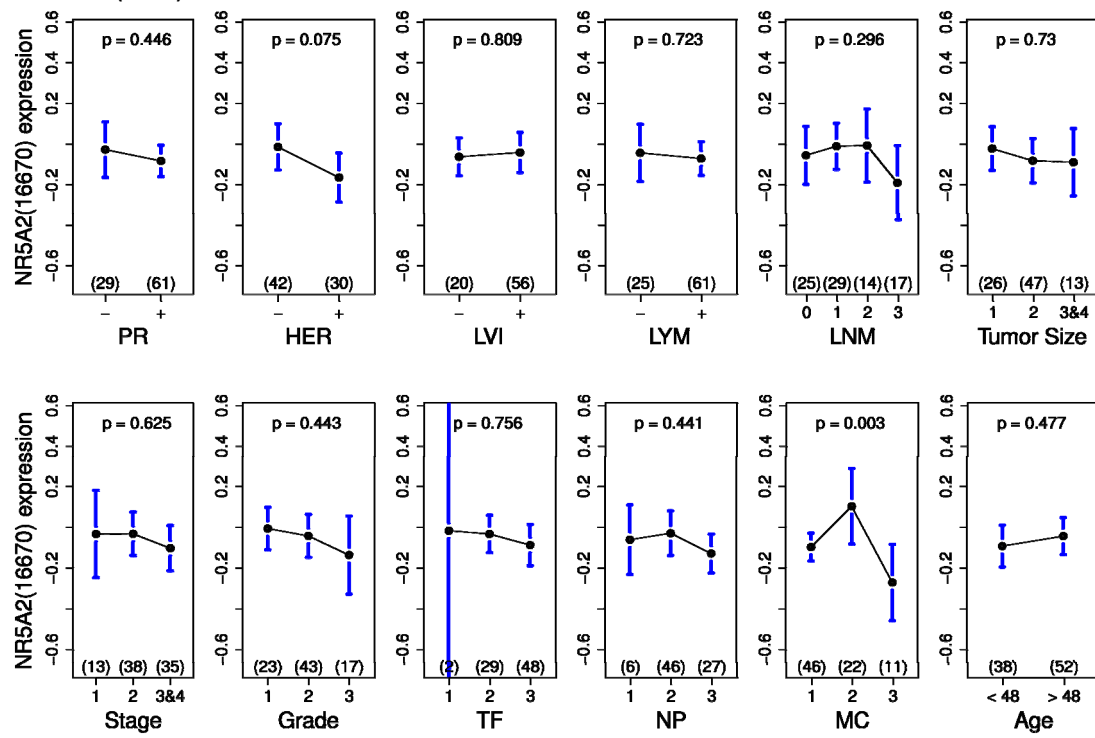



**Figure S10.4.** Heatmaps for the common gene pool in prognostic feature type IV of *NR5A1* and *NR5A2* – 292 probes in 181 IDCs (i.e. 181A) (see Table S6.6).

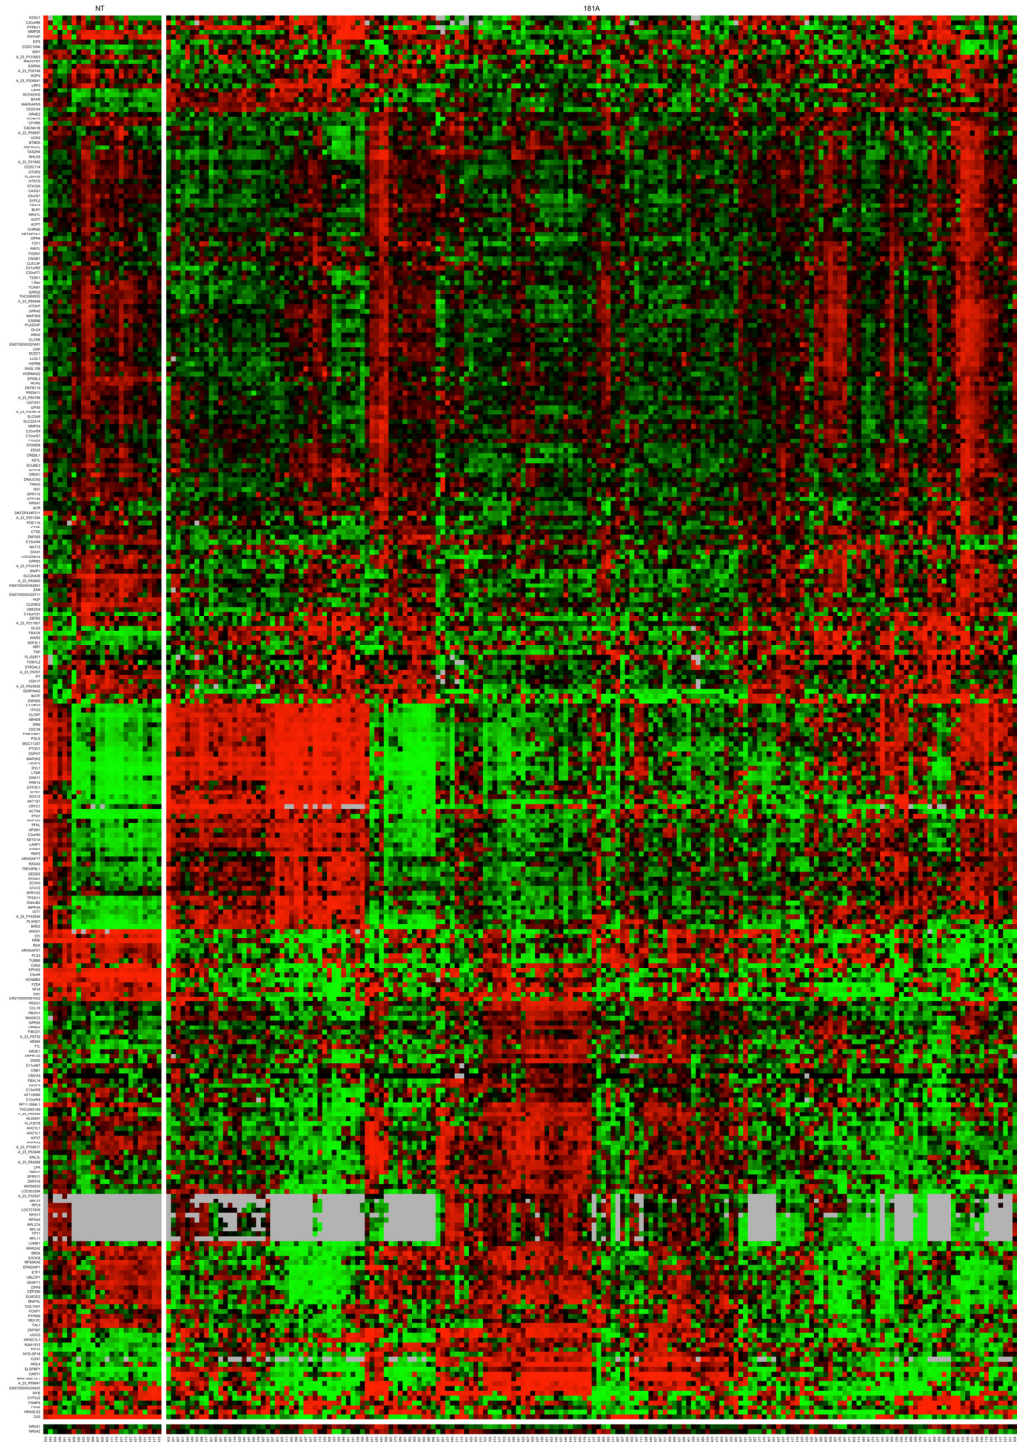

**Figure S10.5.** The potential pathophysiological activities driven by *NR5A1* and *NR5A2* in 181A cohort, respectively.

Six examples are shown by the pair wise comparison between subnetworks of *NR5A1* and *NR5A2* for six pathophysiological activities that are predicted to be regulated by *NR5A1* and *NR5A2*, respectively. They are cell cycle regulation (A), tumor progression and carcinogenesis (B), steroidogenesis (C), sustained angiogenesis (D), Warburg effect (E) and epithelial mesenchymal transition (EMT) (F).

The significant regulatory relationship between a transcription factors (e.g. *NR5A1*, *NR5A2*) and its inferred target gene are linked by an arrow tailed with a solid line. On the other hand, the insignificant one is linked by an arrow tailed with a dashed line. A circle or rectangle colored in blue stands for the relatively high expression level of a gene of interest. A circle or rectangle colored in green stands for the relatively low expression level of a gene of interest. When an arrow shows up or down next to the individual pathophysiological activity of interest, it indicates activated or suppressed activity based on the comparison of the sum activities between both subnetworks for the pathophysiological event of interest.

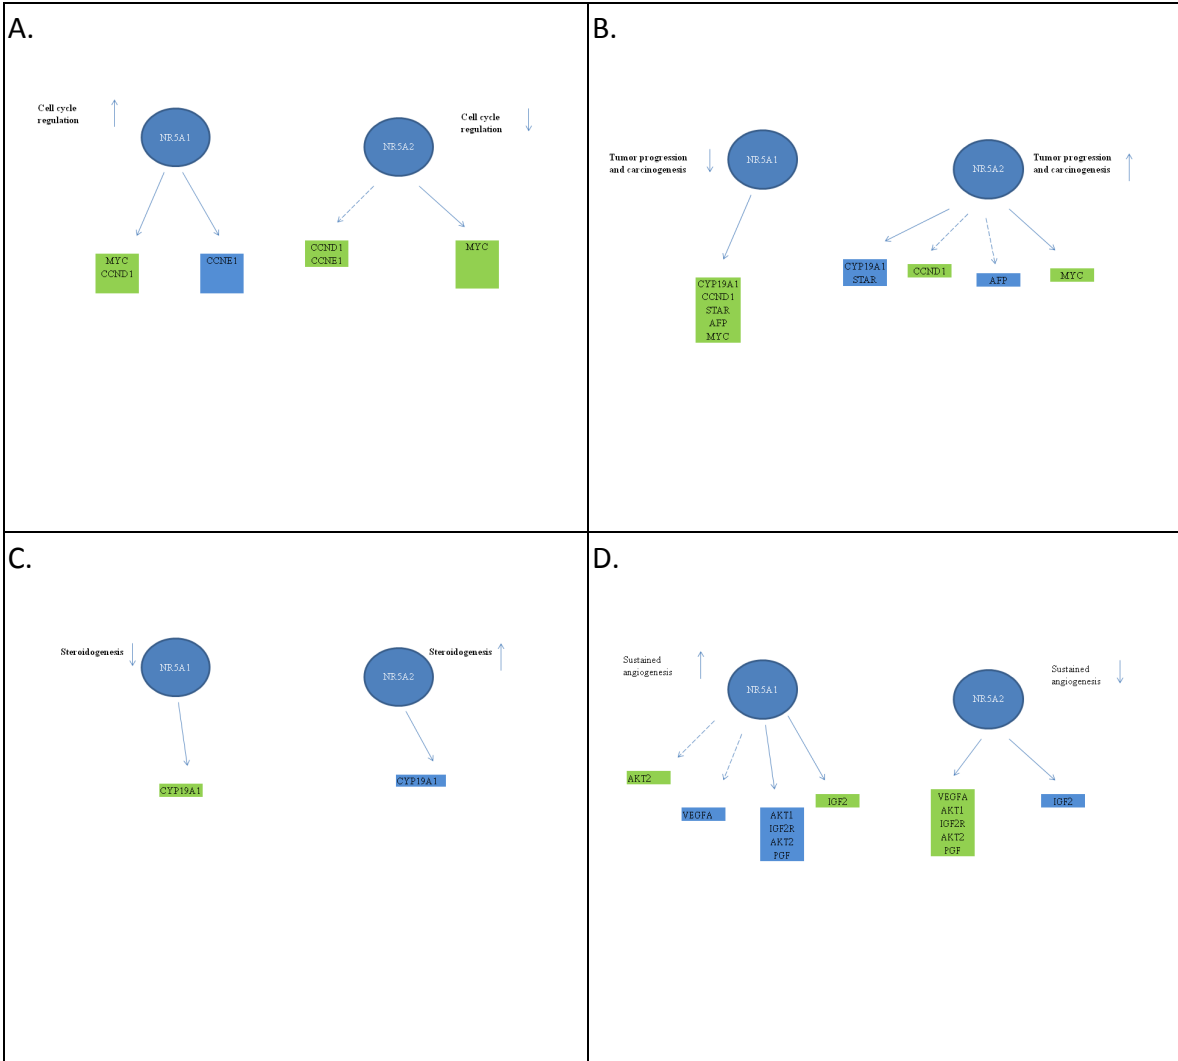

E.

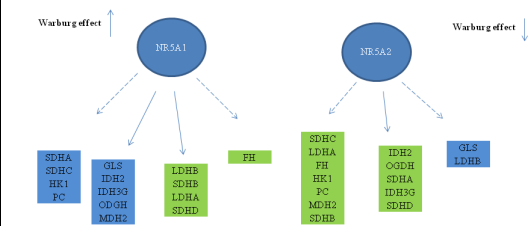

F.

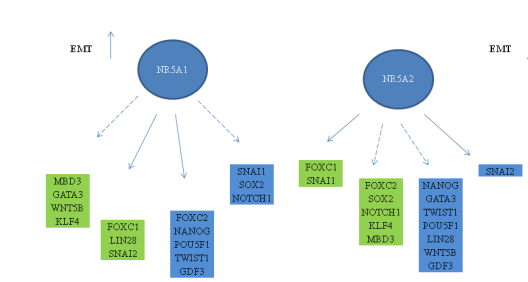

**Table S10.1.** Univariate and multivariate analyses for survival on prognostic factors in 91A cohort and 181A cohort. The p values of tests in the Cox proportional hazard (COXPH) model to be less or equal to 0.05 are high-lighted with light blue.

A.

| 91A cohort                              | Univariate Analysis (N=91) |         |
|-----------------------------------------|----------------------------|---------|
| Prognostic factor                       | Hazard Ratio               | P value |
| 15 gene signature (subcohort I/II)      | 0.00                       | 1.00    |
| 15 gene signature (subcohort I/nonI)    | 0.21                       | 0.01    |
| 15 gene signature (subcohort II/ nonII) | 81766478.08                | 1.00    |

B.

| 36A subcohort in 181A cohort         | Univariate Analysis (N=36) |         | Multivariate Analysis (N=36) |         |
|--------------------------------------|----------------------------|---------|------------------------------|---------|
| Prognostic factor                    | Hazard Ratio               | P value | Hazard Ratio                 | P value |
| Grade1&2 vs. 3                       | 2.25                       | 0.24    | 1.36                         | 0.74    |
| NP 1&2 vs. 3                         | 1.53                       | 0.59    | 1.12                         | 0.90    |
| MC 1&2 vs.3                          | 0.79                       | 0.83    | 2.06                         | 0.60    |
| 15 gene signature (subcohort III/IV) | 0.10                       | 0.03    | 0.10                         | 0.05    |

C.

| 181A cohort                               | Univariate Analysis (N=181) |         | Multivariate Analysis (N=181) |         | Multivariate Analysis (N=181) |         |
|-------------------------------------------|-----------------------------|---------|-------------------------------|---------|-------------------------------|---------|
| Prognostic factor                         | Hazard Ratio                | P value | Hazard Ratio                  | P value | Hazard Ratio                  | P value |
| Grade1&2 vs. 3                            | 2.17                        | 0.05    | 3.22                          | 0.08    | 4.09                          | 0.05    |
| NP 1&2 vs. 3                              | 1.93                        | 0.16    | 0.83                          | 0.75    | 0.85                          | 0.80    |
| MC 1&2 vs.3                               | 1.60                        | 0.32    | 1.17                          | 0.79    | 0.70                          | 0.53    |
| 15 gene signature (subcohort III/non III) | 0.26                        | 0.00    | 0.21                          | 0.00    | -                             | -       |
| 15 gene signature (subcohort IV/nonIV)    | 4.77                        | 0.13    | -                             | -       | 4.08                          | 0.19    |

D.

| 28A subcohort in 181A cohort     | Univariate Analysis (N=28) |         | Multivariate Analysis (N=28) |         |
|----------------------------------|----------------------------|---------|------------------------------|---------|
| Prognostic factor                | Hazard Ratio               | P value | Hazard Ratio                 | P value |
| HER(+) vs. HER(-)                | 2.05                       | 0.61    | 0.00                         | 1.00    |
| LVI(+) vs. LVI(-)                | 0.80                       | 0.88    | 4087576.31                   | 1.00    |
| 8 gene signature (subcohort A/B) | 2040635688.39              | 1.00    | 23034538.51                  | 1.00    |

E.

| 181A cohort                          | Univariate Analysis (N=181) |         | Multivariate Analysis (N=181) |         | Multivariate Analysis (N=181) |         |
|--------------------------------------|-----------------------------|---------|-------------------------------|---------|-------------------------------|---------|
| Prognostic factor                    | Hazard Ratio                | P value | Hazard Ratio                  | P value | Hazard Ratio                  | P value |
| HER(+) vs. HER(-)                    | 0.69                        | 0.39    | 0.30                          | 0.06    | 0.30                          | 0.06    |
| LVI(+) vs. LVI(-)                    | 4.34                        | 0.02    | 10.13                         | 0.02    | 9.96                          | 0.03    |
| 8 gene signature (subcohort A/non A) | 76780909.43                 | 1.00    | 84302285.87                   | 1.00    | -                             | -       |
| 8 gene signature (subcohort B/nonB)  | 0.88                        | 0.84    | -                             | -       | 0.99                          | 0.99    |
